# Supplementary material for: Coordination study of a new class of imine imidazol-2-imine ligands to titanium(iv) and palladium(ii)
Source: Royal Society of Chemistry journal article supplement (doi:10.1039/c0dt00498g), 2010-01-01
Supplement: c0dt00498g.pdf [file c0dt00498g.pdf]

# Single Crystal X-ray Diffraction Report for IMesN<sup>+</sup>Imine.HCl (3a)

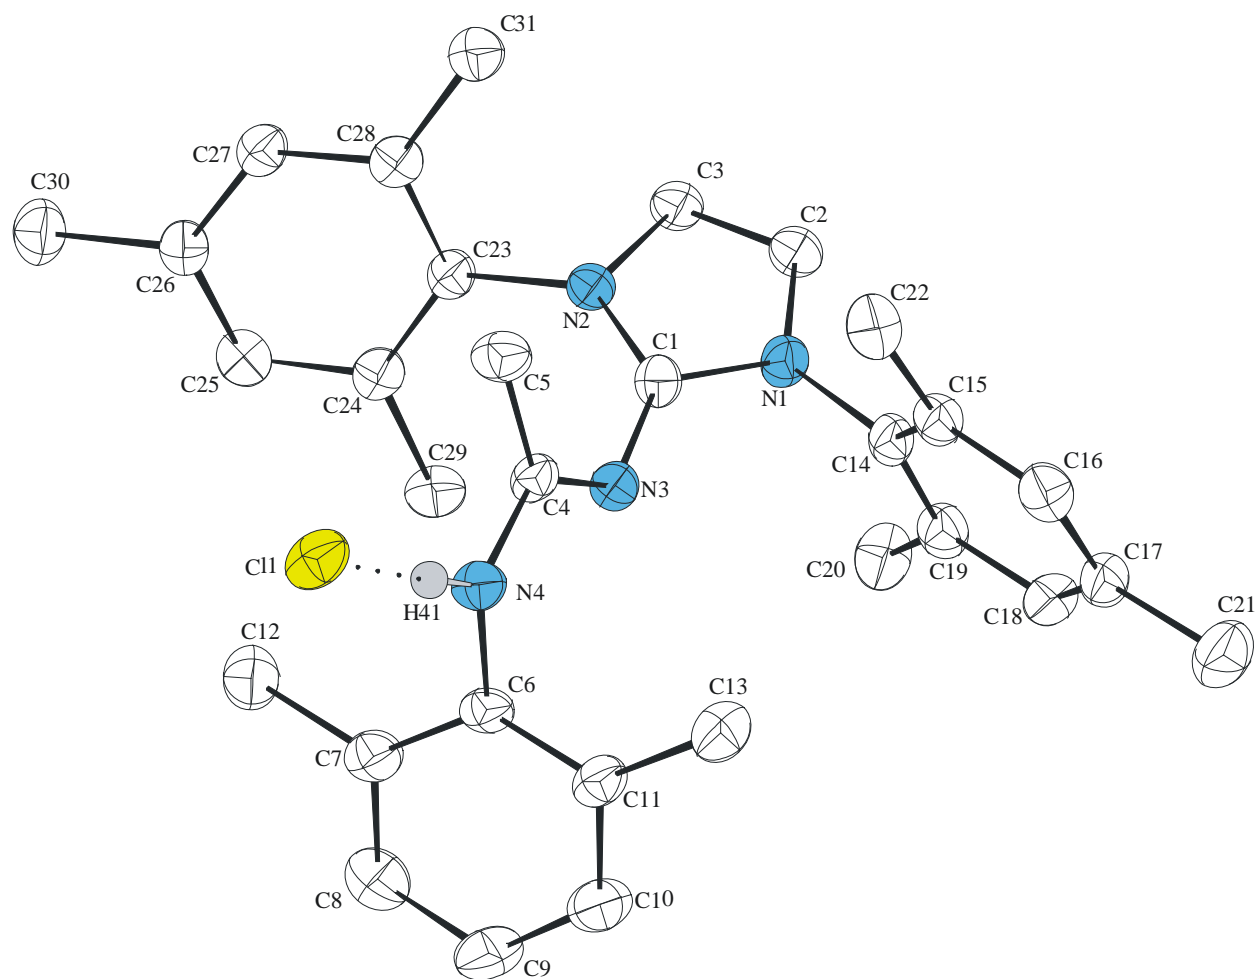

**Table 1. Crystal data and structure refinement for IMeN<sup>+</sup>Imine.HCl (3a)**

|                                   |                                                                |                   |
|-----------------------------------|----------------------------------------------------------------|-------------------|
| Identification code               | k09163a                                                        |                   |
| Empirical formula                 | C <sub>33</sub> H <sub>41</sub> Cl <sub>5</sub> N <sub>4</sub> |                   |
| Formula weight                    | 670.95                                                         |                   |
| Temperature                       | 150(1) K                                                       |                   |
| Wavelength                        | 0.71073 Å                                                      |                   |
| Crystal system                    | Monoclinic                                                     |                   |
| Space group                       | P 2 <sub>1</sub> /c                                            |                   |
| Unit cell dimensions              | a = 15.8893(8) Å                                               | α = 90°.          |
|                                   | b = 15.8157(5) Å                                               | β = 90.3420(18)°. |
|                                   | c = 13.8555(9) Å                                               | γ = 90°.          |
| Volume                            | 3481.8(3) Å <sup>3</sup>                                       |                   |
| Z                                 | 4                                                              |                   |
| Density (calculated)              | 1.280 Mg/m <sup>3</sup>                                        |                   |
| Absorption coefficient            | 0.445 mm <sup>-1</sup>                                         |                   |
| F(000)                            | 1408                                                           |                   |
| Crystal size                      | 0.32 x 0.12 x 0.12 mm <sup>3</sup>                             |                   |
| Theta range for data collection   | 2.56 to 25.00°.                                                |                   |
| Index ranges                      | -18 ≤ h ≤ 18, -18 ≤ k ≤ 17, -16 ≤ l ≤ 16                       |                   |
| Reflections collected             | 19493                                                          |                   |
| Independent reflections           | 6120 [R(int) = 0.0743]                                         |                   |
| Completeness to theta = 25.00°    | 99.8 %                                                         |                   |
| Absorption correction             | Semi-empirical from equivalents                                |                   |
| Max. and min. transmission        | 0.989 and 0.780                                                |                   |
| Refinement method                 | Full-matrix least-squares on F <sup>2</sup>                    |                   |
| Data / restraints / parameters    | 6120 / 0 / 392                                                 |                   |
| Goodness-of-fit on F <sup>2</sup> | 1.018                                                          |                   |
| Final R indices [I > 2σ(I)]       | R <sub>1</sub> = 0.0590, wR <sub>2</sub> = 0.1379              |                   |
| R indices (all data)              | R <sub>1</sub> = 0.1251, wR <sub>2</sub> = 0.1736              |                   |
| Largest diff. peak and hole       | 0.493 and -0.362 e.Å <sup>-3</sup>                             |                   |

**Table 2. Atomic coordinates ( $\times 10^4$ ) and equivalent isotropic displacement parameters ( $\text{\AA}^2 \times 10^3$ ) for k09163a.  $U(\text{eq})$  is defined as one third of the trace of the orthogonalized  $U^{ij}$  tensor.**

|       | x       | y       | z       | $U(\text{eq})$ |
|-------|---------|---------|---------|----------------|
| N(1)  | 3757(2) | 5610(2) | 1745(2) | 30(1)          |
| N(2)  | 4587(2) | 4948(2) | 2740(2) | 26(1)          |
| N(3)  | 3198(2) | 4354(2) | 2417(2) | 27(1)          |
| N(4)  | 2681(2) | 3024(2) | 2603(2) | 31(1)          |
| C(1)  | 3828(2) | 4904(2) | 2290(2) | 27(1)          |
| C(2)  | 4486(2) | 6094(2) | 1852(3) | 32(1)          |
| C(3)  | 5001(2) | 5686(2) | 2460(3) | 30(1)          |
| C(4)  | 3290(2) | 3537(2) | 2305(3) | 27(1)          |
| C(5)  | 4031(2) | 3111(2) | 1840(3) | 34(1)          |
| C(6)  | 1954(2) | 3281(2) | 3142(3) | 30(1)          |
| C(7)  | 1928(2) | 3022(2) | 4109(3) | 34(1)          |
| C(8)  | 1210(3) | 3234(2) | 4634(3) | 46(1)          |
| C(9)  | 554(3)  | 3668(2) | 4211(3) | 51(1)          |
| C(10) | 598(3)  | 3917(2) | 3248(3) | 48(1)          |
| C(11) | 1311(2) | 3724(2) | 2697(3) | 33(1)          |
| C(12) | 2629(3) | 2525(2) | 4570(3) | 45(1)          |
| C(13) | 1338(3) | 3982(2) | 1646(3) | 45(1)          |
| C(14) | 3037(2) | 5834(2) | 1152(3) | 31(1)          |
| C(15) | 2959(2) | 5473(2) | 237(3)  | 32(1)          |
| C(16) | 2287(2) | 5738(2) | -338(3) | 36(1)          |
| C(17) | 1717(2) | 6343(2) | -24(3)  | 37(1)          |
| C(18) | 1810(2) | 6660(2) | 903(3)  | 38(1)          |
| C(19) | 2464(2) | 6412(2) | 1511(3) | 34(1)          |
| C(20) | 2532(3) | 6742(2) | 2526(3) | 44(1)          |
| C(21) | 1010(3) | 6643(3) | -668(3) | 50(1)          |
| C(22) | 3560(3) | 4797(2) | -107(3) | 41(1)          |
| C(23) | 4915(2) | 4342(2) | 3433(3) | 27(1)          |
| C(24) | 4483(2) | 4219(2) | 4297(3) | 28(1)          |
| C(25) | 4819(2) | 3623(2) | 4939(3) | 32(1)          |
| C(26) | 5556(2) | 3181(2) | 4746(3) | 29(1)          |
| C(27) | 5976(2) | 3350(2) | 3892(3) | 30(1)          |

|       |         |         |         |       |
|-------|---------|---------|---------|-------|
| C(28) | 5664(2) | 3921(2) | 3211(2) | 28(1) |
| C(29) | 3709(2) | 4700(2) | 4572(3) | 34(1) |
| C(30) | 5914(3) | 2554(2) | 5460(3) | 43(1) |
| C(31) | 6135(2) | 4076(2) | 2294(3) | 32(1) |
| Cl(1) | 2889(1) | 1132(1) | 2097(1) | 41(1) |
| Cl(2) | 1684(1) | 5994(1) | 6832(1) | 62(1) |
| Cl(3) | 1734(1) | 5846(1) | 4747(1) | 85(1) |
| C(32) | 1655(3) | 5301(3) | 5847(3) | 58(1) |
| Cl(4) | -42(1)  | 3739(1) | 7013(1) | 70(1) |
| Cl(5) | 594(1)  | 4258(1) | 8891(1) | 80(1) |
| C(33) | 711(3)  | 3557(3) | 7920(3) | 55(1) |

---

**Table 3. Bond lengths [ $\text{\AA}$ ] and angles [ $^\circ$ ] for k09163a.**

|              |          |              |          |              |          |
|--------------|----------|--------------|----------|--------------|----------|
| N(1)-C(1)    | 1.354(4) | C(13)-H(13B) | 0.9800   | C(29)-H(29C) | 0.9800   |
| N(1)-C(2)    | 1.396(4) | C(13)-H(13C) | 0.9800   | C(30)-H(30A) | 0.9800   |
| N(1)-C(14)   | 1.448(4) | C(14)-C(19)  | 1.385(5) | C(30)-H(30B) | 0.9800   |
| N(2)-C(1)    | 1.356(4) | C(14)-C(15)  | 1.396(5) | C(30)-H(30C) | 0.9800   |
| N(2)-C(3)    | 1.397(4) | C(15)-C(16)  | 1.392(5) | C(31)-H(31A) | 0.9800   |
| N(2)-C(23)   | 1.450(4) | C(15)-C(22)  | 1.512(5) | C(31)-H(31B) | 0.9800   |
| N(3)-C(4)    | 1.311(4) | C(16)-C(17)  | 1.389(5) | C(31)-H(31C) | 0.9800   |
| N(3)-C(1)    | 1.338(4) | C(16)-H(16A) | 0.9500   | Cl(2)-C(32)  | 1.752(4) |
| N(4)-C(4)    | 1.330(4) | C(17)-C(18)  | 1.386(5) | Cl(3)-C(32)  | 1.756(4) |
| N(4)-C(6)    | 1.438(4) | C(17)-C(21)  | 1.507(5) | C(32)-H(32A) | 0.9900   |
| N(4)-H(4N)   | 0.86(3)  | C(18)-C(19)  | 1.389(5) | C(32)-H(32B) | 0.9900   |
| C(2)-C(3)    | 1.336(5) | C(18)-H(18A) | 0.9500   | Cl(4)-C(33)  | 1.754(4) |
| C(2)-H(2A)   | 0.9500   | C(19)-C(20)  | 1.503(5) | Cl(5)-C(33)  | 1.755(4) |
| C(3)-H(3A)   | 0.9500   | C(20)-H(20A) | 0.9800   | C(33)-H(33A) | 0.9900   |
| C(4)-C(5)    | 1.504(5) | C(20)-H(20B) | 0.9800   | C(33)-H(33B) | 0.9900   |
| C(5)-H(5A)   | 0.9800   | C(20)-H(20C) | 0.9800   |              |          |
| C(5)-H(5B)   | 0.9800   | C(21)-H(21A) | 0.9800   |              |          |
| C(5)-H(5C)   | 0.9800   | C(21)-H(21B) | 0.9800   |              |          |
| C(6)-C(11)   | 1.382(5) | C(21)-H(21C) | 0.9800   |              |          |
| C(6)-C(7)    | 1.401(5) | C(22)-H(22A) | 0.9800   |              |          |
| C(7)-C(8)    | 1.397(5) | C(22)-H(22B) | 0.9800   |              |          |
| C(7)-C(12)   | 1.503(5) | C(22)-H(22C) | 0.9800   |              |          |
| C(8)-C(9)    | 1.377(6) | C(23)-C(24)  | 1.397(5) |              |          |
| C(8)-H(8A)   | 0.9500   | C(23)-C(28)  | 1.400(5) |              |          |
| C(9)-C(10)   | 1.394(6) | C(24)-C(25)  | 1.399(5) |              |          |
| C(9)-H(9A)   | 0.9500   | C(24)-C(29)  | 1.498(5) |              |          |
| C(10)-C(11)  | 1.403(5) | C(25)-C(26)  | 1.391(5) |              |          |
| C(10)-H(10A) | 0.9500   | C(25)-H(25A) | 0.9500   |              |          |
| C(11)-C(13)  | 1.512(5) | C(26)-C(27)  | 1.388(5) |              |          |
| C(12)-H(12A) | 0.9800   | C(26)-C(30)  | 1.509(5) |              |          |
| C(12)-H(12B) | 0.9800   | C(27)-C(28)  | 1.395(5) |              |          |
| C(12)-H(12C) | 0.9800   | C(27)-H(27A) | 0.9500   |              |          |
| C(13)-H(13A) | 0.9800   | C(28)-C(31)  | 1.498(5) |              |          |

|                   |          |                     |          |
|-------------------|----------|---------------------|----------|
| C(1)-N(1)-C(2)    | 109.0(3) | C(9)-C(8)-H(8A)     | 119.5    |
| C(1)-N(1)-C(14)   | 125.6(3) | C(7)-C(8)-H(8A)     | 119.5    |
| C(2)-N(1)-C(14)   | 125.4(3) | C(8)-C(9)-C(10)     | 120.4(4) |
| C(1)-N(2)-C(3)    | 109.5(3) | C(8)-C(9)-H(9A)     | 119.8    |
| C(1)-N(2)-C(23)   | 125.8(3) | C(10)-C(9)-H(9A)    | 119.8    |
| C(3)-N(2)-C(23)   | 124.6(3) | C(9)-C(10)-C(11)    | 120.4(4) |
| C(4)-N(3)-C(1)    | 122.7(3) | C(9)-C(10)-H(10A)   | 119.8    |
| C(4)-N(4)-C(6)    | 125.3(3) | C(11)-C(10)-H(10A)  | 119.8    |
| C(4)-N(4)-H(4N)   | 116(2)   | C(6)-C(11)-C(10)    | 117.7(4) |
| C(6)-N(4)-H(4N)   | 118(2)   | C(6)-C(11)-C(13)    | 122.7(3) |
| N(3)-C(1)-N(1)    | 123.3(3) | C(10)-C(11)-C(13)   | 119.6(3) |
| N(3)-C(1)-N(2)    | 129.6(3) | C(7)-C(12)-H(12A)   | 109.5    |
| N(1)-C(1)-N(2)    | 106.6(3) | C(7)-C(12)-H(12B)   | 109.5    |
| C(3)-C(2)-N(1)    | 107.9(3) | H(12A)-C(12)-H(12B) | 109.5    |
| C(3)-C(2)-H(2A)   | 126.0    | C(7)-C(12)-H(12C)   | 109.5    |
| N(1)-C(2)-H(2A)   | 126.0    | H(12A)-C(12)-H(12C) | 109.5    |
| C(2)-C(3)-N(2)    | 106.9(3) | H(12B)-C(12)-H(12C) | 109.5    |
| C(2)-C(3)-H(3A)   | 126.5    | C(11)-C(13)-H(13A)  | 109.5    |
| N(2)-C(3)-H(3A)   | 126.5    | C(11)-C(13)-H(13B)  | 109.5    |
| N(3)-C(4)-N(4)    | 118.8(3) | H(13A)-C(13)-H(13B) | 109.5    |
| N(3)-C(4)-C(5)    | 125.5(3) | C(11)-C(13)-H(13C)  | 109.5    |
| N(4)-C(4)-C(5)    | 115.7(3) | H(13A)-C(13)-H(13C) | 109.5    |
| C(4)-C(5)-H(5A)   | 109.5    | H(13B)-C(13)-H(13C) | 109.5    |
| C(4)-C(5)-H(5B)   | 109.5    | C(19)-C(14)-C(15)   | 122.7(3) |
| H(5A)-C(5)-H(5B)  | 109.5    | C(19)-C(14)-N(1)    | 118.5(3) |
| C(4)-C(5)-H(5C)   | 109.5    | C(15)-C(14)-N(1)    | 118.7(3) |
| H(5A)-C(5)-H(5C)  | 109.5    | C(16)-C(15)-C(14)   | 117.4(3) |
| H(5B)-C(5)-H(5C)  | 109.5    | C(16)-C(15)-C(22)   | 121.1(3) |
| C(11)-C(6)-C(7)   | 123.3(3) | C(14)-C(15)-C(22)   | 121.5(3) |
| C(11)-C(6)-N(4)   | 120.4(3) | C(17)-C(16)-C(15)   | 121.8(3) |
| C(7)-C(6)-N(4)    | 116.2(3) | C(17)-C(16)-H(16A)  | 119.1    |
| C(8)-C(7)-C(6)    | 117.2(3) | C(15)-C(16)-H(16A)  | 119.1    |
| C(8)-C(7)-C(12)   | 120.5(4) | C(18)-C(17)-C(16)   | 118.3(3) |
| C(6)-C(7)-C(12)   | 122.3(3) | C(18)-C(17)-C(21)   | 120.7(4) |
| C(9)-C(8)-C(7)    | 121.0(4) | C(16)-C(17)-C(21)   | 121.1(4) |
| C(17)-C(18)-C(19) | 122.4(4) | C(25)-C(26)-C(30)   | 121.3(3) |

|                     |          |                     |          |
|---------------------|----------|---------------------|----------|
| C(17)-C(18)-H(18A)  | 118.8    | C(26)-C(27)-C(28)   | 122.0(3) |
| C(19)-C(18)-H(18A)  | 118.8    | C(26)-C(27)-H(27A)  | 119.0    |
| C(14)-C(19)-C(18)   | 117.4(3) | C(28)-C(27)-H(27A)  | 119.0    |
| C(14)-C(19)-C(20)   | 121.3(3) | C(27)-C(28)-C(23)   | 117.3(3) |
| C(18)-C(19)-C(20)   | 121.3(3) | C(27)-C(28)-C(31)   | 120.2(3) |
| C(19)-C(20)-H(20A)  | 109.5    | C(23)-C(28)-C(31)   | 122.5(3) |
| C(19)-C(20)-H(20B)  | 109.5    | C(24)-C(29)-H(29A)  | 109.5    |
| H(20A)-C(20)-H(20B) | 109.5    | C(24)-C(29)-H(29B)  | 109.5    |
| C(19)-C(20)-H(20C)  | 109.5    | H(29A)-C(29)-H(29B) | 109.5    |
| H(20A)-C(20)-H(20C) | 109.5    | C(24)-C(29)-H(29C)  | 109.5    |
| H(20B)-C(20)-H(20C) | 109.5    | H(29A)-C(29)-H(29C) | 109.5    |
| C(17)-C(21)-H(21A)  | 109.5    | H(29B)-C(29)-H(29C) | 109.5    |
| C(17)-C(21)-H(21B)  | 109.5    | C(26)-C(30)-H(30A)  | 109.5    |
| H(21A)-C(21)-H(21B) | 109.5    | C(26)-C(30)-H(30B)  | 109.5    |
| C(17)-C(21)-H(21C)  | 109.5    | H(30A)-C(30)-H(30B) | 109.5    |
| H(21A)-C(21)-H(21C) | 109.5    | C(26)-C(30)-H(30C)  | 109.5    |
| H(21B)-C(21)-H(21C) | 109.5    | H(30A)-C(30)-H(30C) | 109.5    |
| C(15)-C(22)-H(22A)  | 109.5    | H(30B)-C(30)-H(30C) | 109.5    |
| C(15)-C(22)-H(22B)  | 109.5    | C(28)-C(31)-H(31A)  | 109.5    |
| H(22A)-C(22)-H(22B) | 109.5    | C(28)-C(31)-H(31B)  | 109.5    |
| C(15)-C(22)-H(22C)  | 109.5    | H(31A)-C(31)-H(31B) | 109.5    |
| H(22A)-C(22)-H(22C) | 109.5    | C(28)-C(31)-H(31C)  | 109.5    |
| H(22B)-C(22)-H(22C) | 109.5    | H(31A)-C(31)-H(31C) | 109.5    |
| C(24)-C(23)-C(28)   | 123.0(3) | H(31B)-C(31)-H(31C) | 109.5    |
| C(24)-C(23)-N(2)    | 118.9(3) | Cl(2)-C(32)-Cl(3)   | 111.6(2) |
| C(28)-C(23)-N(2)    | 118.1(3) | Cl(2)-C(32)-H(32A)  | 109.3    |
| C(23)-C(24)-C(25)   | 116.8(3) | Cl(3)-C(32)-H(32A)  | 109.3    |
| C(23)-C(24)-C(29)   | 123.8(3) | Cl(2)-C(32)-H(32B)  | 109.3    |
| C(25)-C(24)-C(29)   | 119.4(3) | Cl(3)-C(32)-H(32B)  | 109.3    |
| C(26)-C(25)-C(24)   | 122.3(3) | H(32A)-C(32)-H(32B) | 108.0    |
| C(26)-C(25)-H(25A)  | 118.8    | Cl(4)-C(33)-Cl(5)   | 111.7(2) |
| C(24)-C(25)-H(25A)  | 118.8    | Cl(4)-C(33)-H(33A)  | 109.3    |
| C(27)-C(26)-C(25)   | 118.5(3) | Cl(5)-C(33)-H(33A)  | 109.3    |
| C(27)-C(26)-C(30)   | 120.2(3) | Cl(4)-C(33)-H(33B)  | 109.3    |
| Cl(5)-C(33)-H(33B)  | 109.3    | H(33A)-C(33)-H(33B) | 107.9    |

Symmetry transformations used to generate equivalent atoms:

**Table 4. Anisotropic displacement parameters ( $\text{\AA}^2 \times 10^3$ ) for k09163a. The anisotropic displacement factor exponent takes the form:  $-2\pi^2 [ h^2 a^{*2} U^{11} + \dots + 2 h k a^* b^* U^{12} ]$**

|       | U <sup>11</sup> | U <sup>22</sup> | U <sup>33</sup> | U <sup>23</sup> | U <sup>13</sup> | U <sup>12</sup> |
|-------|-----------------|-----------------|-----------------|-----------------|-----------------|-----------------|
| N(1)  | 27(2)           | 28(2)           | 35(2)           | 4(1)            | -6(1)           | -3(1)           |
| N(2)  | 24(2)           | 23(1)           | 32(2)           | 2(1)            | -1(1)           | -3(1)           |
| N(3)  | 26(2)           | 22(2)           | 35(2)           | 1(1)            | -4(1)           | -3(1)           |
| N(4)  | 28(2)           | 22(2)           | 42(2)           | -2(1)           | 3(2)            | 0(1)            |
| C(1)  | 30(2)           | 24(2)           | 27(2)           | 0(2)            | -1(2)           | 0(2)            |
| C(2)  | 29(2)           | 27(2)           | 38(2)           | 2(2)            | -1(2)           | -6(2)           |
| C(3)  | 27(2)           | 28(2)           | 35(2)           | 2(2)            | -1(2)           | -4(2)           |
| C(4)  | 23(2)           | 25(2)           | 33(2)           | 0(2)            | -5(2)           | -1(2)           |
| C(5)  | 28(2)           | 31(2)           | 44(2)           | -4(2)           | 2(2)            | -3(2)           |
| C(6)  | 24(2)           | 23(2)           | 43(3)           | -1(2)           | 3(2)            | -4(2)           |
| C(7)  | 29(2)           | 26(2)           | 49(3)           | 0(2)            | 1(2)            | -3(2)           |
| C(8)  | 49(3)           | 49(2)           | 40(3)           | 1(2)            | 8(2)            | -3(2)           |
| C(9)  | 34(3)           | 55(3)           | 64(3)           | 2(2)            | 11(2)           | 13(2)           |
| C(10) | 29(3)           | 43(2)           | 71(3)           | 7(2)            | 3(2)            | 2(2)            |
| C(11) | 26(2)           | 27(2)           | 47(3)           | 0(2)            | -5(2)           | 0(2)            |
| C(12) | 45(3)           | 42(2)           | 47(3)           | 7(2)            | -4(2)           | 0(2)            |
| C(13) | 36(3)           | 51(2)           | 49(3)           | 5(2)            | -8(2)           | 3(2)            |
| C(14) | 29(2)           | 25(2)           | 38(2)           | 9(2)            | -6(2)           | -5(2)           |
| C(15) | 32(2)           | 28(2)           | 36(2)           | 5(2)            | -1(2)           | -4(2)           |
| C(16) | 39(3)           | 36(2)           | 32(2)           | 2(2)            | -5(2)           | -9(2)           |
| C(17) | 30(2)           | 39(2)           | 40(3)           | 12(2)           | -7(2)           | -3(2)           |
| C(18) | 30(2)           | 39(2)           | 46(3)           | 7(2)            | 0(2)            | 4(2)            |
| C(19) | 35(2)           | 30(2)           | 36(2)           | 4(2)            | -2(2)           | -4(2)           |
| C(20) | 49(3)           | 42(2)           | 42(3)           | 2(2)            | -4(2)           | 7(2)            |
| C(21) | 43(3)           | 60(3)           | 48(3)           | 5(2)            | -11(2)          | 7(2)            |
| C(22) | 48(3)           | 37(2)           | 39(2)           | 3(2)            | -1(2)           | -1(2)           |
| C(23) | 26(2)           | 20(2)           | 35(2)           | 1(2)            | -3(2)           | -2(2)           |
| C(24) | 28(2)           | 24(2)           | 33(2)           | -3(2)           | -6(2)           | -4(2)           |
| C(25) | 37(2)           | 30(2)           | 30(2)           | -3(2)           | 2(2)            | -2(2)           |
| C(26) | 33(2)           | 25(2)           | 29(2)           | 0(2)            | -6(2)           | -4(2)           |
| C(27) | 28(2)           | 27(2)           | 34(2)           | -1(2)           | -4(2)           | 1(2)            |



|       |       |        |       |        |        |        |
|-------|-------|--------|-------|--------|--------|--------|
| C(28) | 28(2) | 24(2)  | 31(2) | -5(2)  | -4(2)  | -4(2)  |
| C(29) | 31(2) | 33(2)  | 37(2) | -6(2)  | 2(2)   | -1(2)  |
| C(30) | 48(3) | 36(2)  | 46(3) | 9(2)   | -4(2)  | 4(2)   |
| C(31) | 32(2) | 31(2)  | 35(2) | -2(2)  | 1(2)   | 0(2)   |
| Cl(1) | 33(1) | 28(1)  | 61(1) | -6(1)  | -6(1)  | 2(1)   |
| Cl(2) | 47(1) | 71(1)  | 70(1) | -6(1)  | -10(1) | 5(1)   |
| Cl(3) | 68(1) | 124(1) | 63(1) | 40(1)  | 18(1)  | 39(1)  |
| C(32) | 60(3) | 61(3)  | 52(3) | 8(2)   | 3(2)   | 15(2)  |
| Cl(4) | 56(1) | 88(1)  | 67(1) | 6(1)   | -8(1)  | -1(1)  |
| Cl(5) | 89(1) | 78(1)  | 73(1) | -12(1) | -1(1)  | -15(1) |
| C(33) | 42(3) | 50(2)  | 73(3) | 6(2)   | -3(2)  | 9(2)   |

---

**Table 5. Hydrogen coordinates ( $\times 10^4$ ) and isotropic displacement parameters ( $\text{\AA}^2 \times 10^{-3}$ ) for k09163a.**

|        | x        | y        | z        | U(eq)  |
|--------|----------|----------|----------|--------|
| H(4N)  | 2740(20) | 2490(20) | 2480(20) | 33(10) |
| H(2A)  | 4598     | 6619     | 1546     | 38     |
| H(3A)  | 5545     | 5865     | 2664     | 36     |
| H(5A)  | 4369     | 3533     | 1499     | 51     |
| H(5B)  | 3830     | 2684     | 1380     | 51     |
| H(5C)  | 4377     | 2838     | 2338     | 51     |
| H(8A)  | 1175     | 3075     | 5294     | 55     |
| H(9A)  | 69       | 3800     | 4578     | 61     |
| H(10A) | 143      | 4218     | 2963     | 57     |
| H(12A) | 3167     | 2805     | 4444     | 68     |
| H(12B) | 2638     | 1953     | 4300     | 68     |
| H(12C) | 2538     | 2494     | 5269     | 68     |
| H(13A) | 1590     | 3525     | 1266     | 68     |
| H(13B) | 1677     | 4496     | 1579     | 68     |
| H(13C) | 765      | 4091     | 1412     | 68     |
| H(16A) | 2217     | 5499     | -962     | 43     |
| H(18A) | 1413     | 7060     | 1132     | 46     |
| H(20A) | 2576     | 6265     | 2976     | 67     |
| H(20B) | 2032     | 7077     | 2678     | 67     |
| H(20C) | 3035     | 7097     | 2587     | 67     |
| H(21A) | 514      | 6767     | -275     | 75     |
| H(21B) | 872      | 6201     | -1138    | 75     |
| H(21C) | 1185     | 7156     | -1009    | 75     |
| H(22A) | 4137     | 5014     | -79      | 62     |
| H(22B) | 3419     | 4641     | -772     | 62     |
| H(22C) | 3513     | 4299     | 310      | 62     |
| H(25A) | 4534     | 3517     | 5527     | 39     |
| H(27A) | 6492     | 3068     | 3768     | 36     |
| H(29A) | 3642     | 4682     | 5275     | 50     |
| H(29B) | 3216     | 4443     | 4261     | 50     |

|        |      |      |      |    |
|--------|------|------|------|----|
| H(29C) | 3763 | 5288 | 4362 | 50 |
| H(30A) | 5769 | 2730 | 6117 | 65 |
| H(30B) | 6528 | 2534 | 5396 | 65 |
| H(30C) | 5678 | 1993 | 5332 | 65 |
| H(31A) | 5734 | 4157 | 1762 | 49 |
| H(31B) | 6496 | 3589 | 2155 | 49 |
| H(31C) | 6484 | 4583 | 2365 | 49 |
| H(32A) | 1121 | 4978 | 5856 | 69 |
| H(32B) | 2125 | 4892 | 5903 | 69 |
| H(33A) | 1281 | 3622 | 7646 | 66 |
| H(33B) | 656  | 2969 | 8156 | 66 |

---

**Table 6. Hydrogen bonds for k09163a [ $\text{\AA}$  and  $^\circ$ ].**

| D-H...A            | d(D-H)  | d(H...A) | d(D...A) | $\angle$ (DHA) |
|--------------------|---------|----------|----------|----------------|
| N(4)-H(4N)...Cl(1) | 0.86(3) | 2.23(3)  | 3.091(3) | 178(3)         |

Symmetry transformations used to generate equivalent atoms:

# Single Crystal X-ray Diffraction Report for IPrN<sup>+</sup>Imine.HCl (3b)

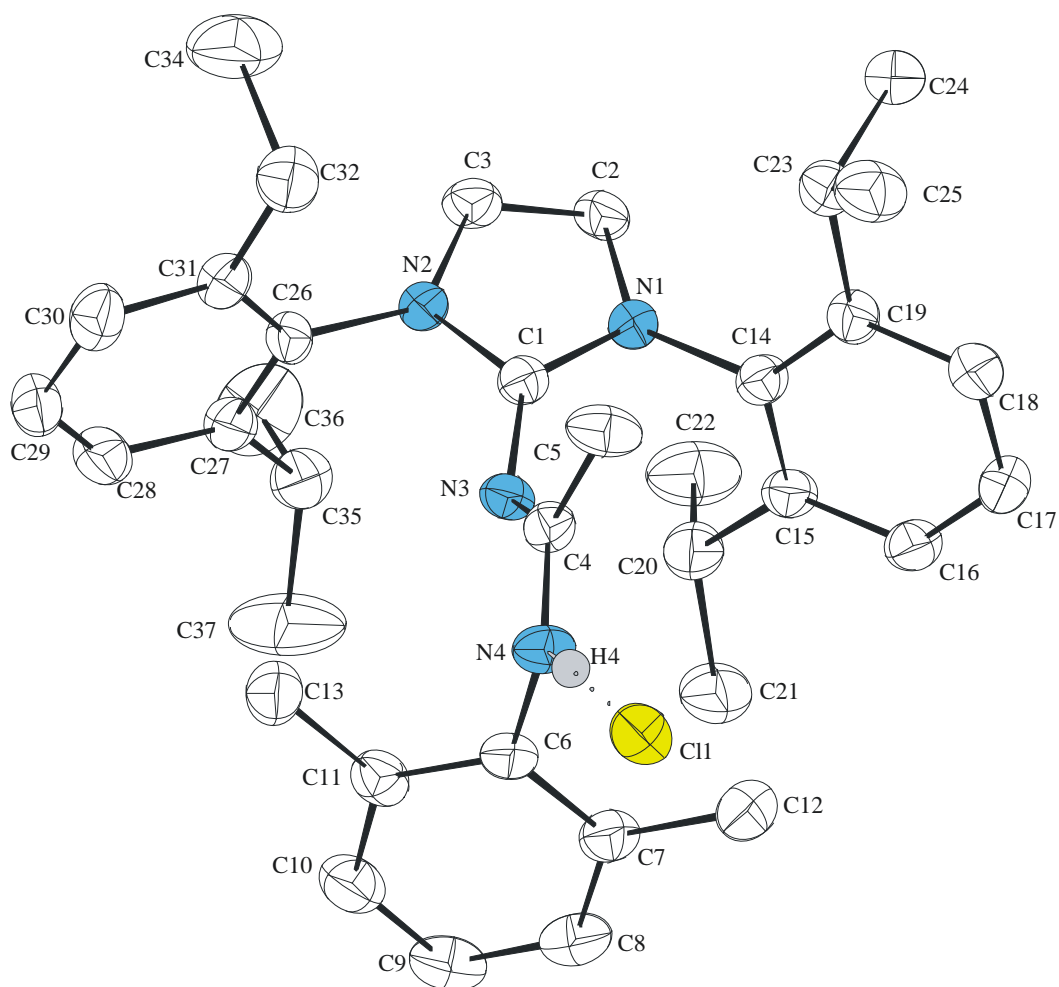

**Table 1. Crystal data and structure refinement for IPrN<sup>+</sup>Imine.HCl (3b)**

|                                   |                                                                |                    |
|-----------------------------------|----------------------------------------------------------------|--------------------|
| Identification code               | k09161                                                         |                    |
| Empirical formula                 | C <sub>39</sub> H <sub>53</sub> Cl <sub>5</sub> N <sub>4</sub> |                    |
| Formula weight                    | 755.10                                                         |                    |
| Temperature                       | 150(1) K                                                       |                    |
| Wavelength                        | 0.71073 Å                                                      |                    |
| Crystal system                    | Monoclinic                                                     |                    |
| Space group                       | P 2 <sub>1</sub> /c                                            |                    |
| Unit cell dimensions              | a = 10.9207(3) Å                                               | α = 90°.           |
|                                   | b = 23.5718(6) Å                                               | β = 108.0720(12)°. |
|                                   | c = 16.7583(4) Å                                               | γ = 90°.           |
| Volume                            | 4101.11(18) Å <sup>3</sup>                                     |                    |
| Z                                 | 4                                                              |                    |
| Density (calculated)              | 1.223 Mg/m <sup>3</sup>                                        |                    |
| Absorption coefficient            | 0.385 mm <sup>-1</sup>                                         |                    |
| F(000)                            | 1600                                                           |                    |
| Crystal size                      | 0.60 x 0.40 x 0.20 mm <sup>3</sup>                             |                    |
| Theta range for data collection   | 2.56 to 25.00°.                                                |                    |
| Index ranges                      | -12 ≤ h ≤ 12, -27 ≤ k ≤ 28, -19 ≤ l ≤ 19                       |                    |
| Reflections collected             | 17529                                                          |                    |
| Independent reflections           | 7134 [R(int) = 0.0516]                                         |                    |
| Completeness to theta = 25.00°    | 99.1 %                                                         |                    |
| Absorption correction             | Semi-empirical from equivalents                                |                    |
| Max. and min. transmission        | 0.935 and 0.522                                                |                    |
| Refinement method                 | Full-matrix least-squares on F <sup>2</sup>                    |                    |
| Data / restraints / parameters    | 7134 / 18 / 473                                                |                    |
| Goodness-of-fit on F <sup>2</sup> | 1.094                                                          |                    |
| Final R indices [I > 2σ(I)]       | R1 = 0.0720, wR2 = 0.1850                                      |                    |
| R indices (all data)              | R1 = 0.1010, wR2 = 0.2027                                      |                    |
| Largest diff. peak and hole       | 0.955 and -0.438 e.Å <sup>-3</sup>                             |                    |

**Table 2. Atomic coordinates ( $\times 10^4$ ) and equivalent isotropic displacement parameters ( $\text{\AA}^2 \times 10^3$ ) for k09161.  $U(\text{eq})$  is defined as one third of the trace of the orthogonalized  $U^{ij}$  tensor.**

|       | x       | y       | z       | $U(\text{eq})$ |
|-------|---------|---------|---------|----------------|
| N(1)  | 4623(3) | 6615(1) | 1753(2) | 29(1)          |
| N(2)  | 5171(3) | 6758(1) | 3101(2) | 30(1)          |
| N(3)  | 4129(3) | 5882(1) | 2626(2) | 30(1)          |
| N(4)  | 3807(3) | 4925(1) | 2517(2) | 34(1)          |
| C(1)  | 4667(3) | 6370(2) | 2492(2) | 28(1)          |
| C(2)  | 5096(4) | 7168(2) | 1903(2) | 33(1)          |
| C(3)  | 5438(4) | 7260(2) | 2736(2) | 35(1)          |
| C(4)  | 4499(3) | 5379(2) | 2467(2) | 30(1)          |
| C(5)  | 5708(4) | 5262(2) | 2233(3) | 43(1)          |
| C(6)  | 2554(4) | 4955(2) | 2632(2) | 33(1)          |
| C(7)  | 1488(4) | 4853(2) | 1931(3) | 39(1)          |
| C(8)  | 279(4)  | 4882(2) | 2044(3) | 49(1)          |
| C(9)  | 143(5)  | 4999(2) | 2819(3) | 54(1)          |
| C(10) | 1201(4) | 5095(2) | 3497(3) | 48(1)          |
| C(11) | 2446(4) | 5068(2) | 3423(2) | 36(1)          |
| C(12) | 1646(4) | 4719(2) | 1093(3) | 48(1)          |
| C(13) | 3613(4) | 5158(2) | 4172(3) | 45(1)          |
| C(14) | 4024(3) | 6371(2) | 930(2)  | 30(1)          |
| C(15) | 2675(4) | 6311(2) | 656(2)  | 32(1)          |
| C(16) | 2129(4) | 6066(2) | -130(2) | 39(1)          |
| C(17) | 2882(4) | 5905(2) | -623(2) | 43(1)          |
| C(18) | 4190(4) | 5989(2) | -349(2) | 38(1)          |
| C(19) | 4799(4) | 6219(2) | 437(2)  | 34(1)          |
| C(20) | 1841(4) | 6547(2) | 1160(3) | 42(1)          |
| C(21) | 526(4)  | 6273(2) | 961(3)  | 51(1)          |
| C(22) | 1691(5) | 7189(2) | 1050(4) | 67(2)          |
| C(23) | 6246(4) | 6322(2) | 705(2)  | 38(1)          |
| C(24) | 6552(4) | 6828(2) | 222(3)  | 44(1)          |
| C(25) | 6986(4) | 5799(2) | 571(3)  | 51(1)          |
| C(26) | 5310(4) | 6671(2) | 3974(2) | 31(1)          |
| C(27) | 4236(4) | 6778(2) | 4244(2) | 36(1)          |

|        |          |          |          |        |
|--------|----------|----------|----------|--------|
| C(28)  | 4381(4)  | 6671(2)  | 5081(3)  | 45(1)  |
| C(29)  | 5531(4)  | 6463(2)  | 5623(3)  | 46(1)  |
| C(30)  | 6574(4)  | 6375(2)  | 5338(2)  | 44(1)  |
| C(31)  | 6494(4)  | 6481(2)  | 4510(2)  | 36(1)  |
| C(32)  | 7675(4)  | 6407(2)  | 4214(3)  | 46(1)  |
| C(33)  | 8310(15) | 5833(4)  | 4427(9)  | 74(3)  |
| C(34)  | 8634(10) | 6879(6)  | 4559(11) | 82(4)  |
| C(33A) | 7910(50) | 5774(5)  | 4200(30) | 35(13) |
| C(34A) | 8820(30) | 6680(30) | 4850(30) | 54(15) |
| C(35)  | 2989(4)  | 7013(2)  | 3660(3)  | 43(1)  |
| C(36)  | 2882(6)  | 7638(2)  | 3828(4)  | 77(2)  |
| C(37)  | 1821(5)  | 6687(3)  | 3707(5)  | 88(2)  |
| Cl(1)  | 4572(1)  | 3709(1)  | 2153(1)  | 42(1)  |
| Cl(2)  | 8464(2)  | 7629(2)  | 2021(2)  | 69(1)  |
| Cl(3)  | 9382(3)  | 8239(1)  | 3578(1)  | 84(1)  |
| C(38)  | 8366(6)  | 8246(4)  | 2557(3)  | 54(2)  |
| Cl(2A) | 8898(14) | 8001(8)  | 3748(8)  | 92(4)  |
| Cl(3A) | 8529(11) | 7387(6)  | 2249(8)  | 69(4)  |
| C(38A) | 8430(60) | 8050(10) | 2665(9)  | 80(20) |
| Cl(4)  | 7896(2)  | 4315(1)  | 4076(1)  | 85(1)  |
| Cl(5)  | 8793(3)  | 3644(1)  | 2934(2)  | 80(1)  |
| C(39)  | 7763(5)  | 3687(2)  | 3527(3)  | 69(2)  |
| Cl(5A) | 9199(15) | 3499(10) | 3380(20) | 99(8)  |

---



**Table 3. Bond lengths [ $\text{\AA}$ ] and angles [ $^\circ$ ] for k09161.**

---

|             |          |
|-------------|----------|
| N(1)-C(1)   | 1.353(5) |
| N(1)-C(2)   | 1.397(5) |
| N(1)-C(14)  | 1.450(5) |
| N(2)-C(1)   | 1.354(5) |
| N(2)-C(3)   | 1.403(5) |
| N(2)-C(26)  | 1.438(5) |
| N(3)-C(4)   | 1.307(5) |
| N(3)-C(1)   | 1.343(5) |
| N(4)-C(4)   | 1.328(5) |
| N(4)-C(6)   | 1.441(5) |
| C(2)-C(3)   | 1.345(5) |
| C(4)-C(5)   | 1.515(5) |
| C(6)-C(11)  | 1.394(5) |
| C(6)-C(7)   | 1.394(5) |
| C(7)-C(8)   | 1.392(6) |
| C(7)-C(12)  | 1.501(6) |
| C(8)-C(9)   | 1.381(7) |
| C(9)-C(10)  | 1.365(7) |
| C(10)-C(11) | 1.404(6) |
| C(11)-C(13) | 1.501(6) |
| C(14)-C(19) | 1.399(5) |
| C(14)-C(15) | 1.407(5) |
| C(15)-C(16) | 1.392(5) |
| C(15)-C(20) | 1.527(6) |
| C(16)-C(17) | 1.388(6) |
| C(17)-C(18) | 1.372(6) |
| C(18)-C(19) | 1.389(5) |
| C(19)-C(23) | 1.522(5) |
| C(20)-C(21) | 1.515(6) |
| C(20)-C(22) | 1.527(7) |
| C(23)-C(25) | 1.528(6) |
| C(23)-C(24) | 1.536(6) |
| C(26)-C(31) | 1.399(5) |
| C(26)-C(27) | 1.404(5) |

|                 |          |
|-----------------|----------|
| C(27)-C(28)     | 1.386(6) |
| C(27)-C(35)     | 1.515(6) |
| C(28)-C(29)     | 1.391(6) |
| C(29)-C(30)     | 1.380(6) |
| C(30)-C(31)     | 1.387(6) |
| C(31)-C(32)     | 1.528(6) |
| C(32)-C(33)     | 1.511(5) |
| C(32)-C(34)     | 1.516(5) |
| C(35)-C(36)     | 1.512(7) |
| C(35)-C(37)     | 1.512(7) |
| Cl(2)-C(38)     | 1.730(6) |
| Cl(3)-C(38)     | 1.727(5) |
| Cl(2A)-C(38A)   | 1.729(7) |
| Cl(3A)-C(38A)   | 1.729(7) |
| Cl(4)-C(39)     | 1.724(4) |
| Cl(5)-C(39)     | 1.721(4) |
|                 |          |
| C(1)-N(1)-C(2)  | 109.1(3) |
| C(1)-N(1)-C(14) | 125.3(3) |
| C(2)-N(1)-C(14) | 125.1(3) |
| C(1)-N(2)-C(3)  | 109.4(3) |
| C(1)-N(2)-C(26) | 124.1(3) |
| C(3)-N(2)-C(26) | 126.4(3) |
| C(4)-N(3)-C(1)  | 124.4(3) |
| C(4)-N(4)-C(6)  | 123.5(3) |
| N(3)-C(1)-N(1)  | 128.7(3) |
| N(3)-C(1)-N(2)  | 123.4(3) |
| N(1)-C(1)-N(2)  | 107.0(3) |
| C(3)-C(2)-N(1)  | 107.7(3) |
| C(2)-C(3)-N(2)  | 106.8(3) |
| N(3)-C(4)-N(4)  | 120.0(3) |
| N(3)-C(4)-C(5)  | 124.6(3) |
| N(4)-C(4)-C(5)  | 115.4(3) |
| C(11)-C(6)-C(7) | 122.6(4) |
| C(11)-C(6)-N(4) | 120.1(3) |
| C(7)-C(6)-N(4)  | 117.3(3) |

|                   |          |
|-------------------|----------|
| C(8)-C(7)-C(6)    | 117.2(4) |
| C(8)-C(7)-C(12)   | 121.7(4) |
| C(6)-C(7)-C(12)   | 121.1(4) |
| C(9)-C(8)-C(7)    | 121.4(4) |
| C(10)-C(9)-C(8)   | 120.4(4) |
| C(9)-C(10)-C(11)  | 120.8(4) |
| C(6)-C(11)-C(10)  | 117.6(4) |
| C(6)-C(11)-C(13)  | 121.5(4) |
| C(10)-C(11)-C(13) | 121.0(4) |
| C(19)-C(14)-C(15) | 123.0(3) |
| C(19)-C(14)-N(1)  | 119.0(3) |
| C(15)-C(14)-N(1)  | 117.9(3) |
| C(16)-C(15)-C(14) | 116.7(3) |
| C(16)-C(15)-C(20) | 121.4(3) |
| C(14)-C(15)-C(20) | 121.8(3) |
| C(17)-C(16)-C(15) | 121.2(4) |
| C(18)-C(17)-C(16) | 120.6(4) |
| C(17)-C(18)-C(19) | 121.1(4) |
| C(18)-C(19)-C(14) | 117.4(4) |
| C(18)-C(19)-C(23) | 119.3(3) |
| C(14)-C(19)-C(23) | 123.2(3) |
| C(21)-C(20)-C(15) | 114.2(4) |
| C(21)-C(20)-C(22) | 109.7(4) |
| C(15)-C(20)-C(22) | 110.8(4) |
| C(19)-C(23)-C(25) | 112.1(3) |
| C(19)-C(23)-C(24) | 110.1(3) |
| C(25)-C(23)-C(24) | 109.7(3) |
| C(31)-C(26)-C(27) | 123.2(3) |
| C(31)-C(26)-N(2)  | 118.9(3) |
| C(27)-C(26)-N(2)  | 117.8(3) |
| C(28)-C(27)-C(26) | 116.7(4) |
| C(28)-C(27)-C(35) | 121.2(4) |
| C(26)-C(27)-C(35) | 122.1(3) |
| C(27)-C(28)-C(29) | 121.3(4) |
| C(30)-C(29)-C(28) | 120.2(4) |
| C(29)-C(30)-C(31) | 121.1(4) |

|                      |           |
|----------------------|-----------|
| C(30)-C(31)-C(26)    | 117.3(4)  |
| C(30)-C(31)-C(32)    | 120.4(4)  |
| C(26)-C(31)-C(32)    | 122.2(3)  |
| C(33)-C(32)-C(34)    | 110.8(6)  |
| C(33)-C(32)-C(31)    | 113.5(5)  |
| C(34)-C(32)-C(31)    | 110.1(4)  |
| C(36)-C(35)-C(37)    | 111.7(4)  |
| C(36)-C(35)-C(27)    | 110.0(4)  |
| C(37)-C(35)-C(27)    | 112.6(4)  |
| Cl(3)-C(38)-Cl(2)    | 112.4(5)  |
| Cl(3A)-C(38A)-Cl(2A) | 109.0(11) |
| Cl(5)-C(39)-Cl(4)    | 113.4(3)  |

---

Symmetry transformations used to generate equivalent atoms:

**Table 4. Anisotropic displacement parameters ( $\text{\AA}^2 \times 10^3$ ) for k09161. The anisotropic displacement factor exponent takes the form:  $-2\pi^2 [ h^2 a^{*2} U^{11} + \dots + 2 h k a^* b^* U^{12} ]$**

|       | U <sup>11</sup> | U <sup>22</sup> | U <sup>33</sup> | U <sup>23</sup> | U <sup>13</sup> | U <sup>12</sup> |
|-------|-----------------|-----------------|-----------------|-----------------|-----------------|-----------------|
| N(1)  | 30(2)           | 29(2)           | 29(2)           | -1(1)           | 9(1)            | -2(1)           |
| N(2)  | 33(2)           | 29(2)           | 29(2)           | -4(1)           | 11(1)           | -5(1)           |
| N(3)  | 31(2)           | 27(2)           | 34(2)           | 0(1)            | 14(1)           | -4(1)           |
| N(4)  | 33(2)           | 25(2)           | 47(2)           | -5(2)           | 16(2)           | -3(1)           |
| C(1)  | 26(2)           | 28(2)           | 31(2)           | -4(2)           | 11(2)           | 0(1)            |
| C(2)  | 38(2)           | 29(2)           | 35(2)           | 3(2)            | 15(2)           | -5(2)           |
| C(3)  | 38(2)           | 26(2)           | 40(2)           | 1(2)            | 12(2)           | -6(2)           |
| C(4)  | 27(2)           | 32(2)           | 30(2)           | 0(2)            | 8(2)            | 0(2)            |
| C(5)  | 34(2)           | 36(2)           | 68(3)           | 0(2)            | 27(2)           | 2(2)            |
| C(6)  | 32(2)           | 29(2)           | 39(2)           | 0(2)            | 13(2)           | -5(2)           |
| C(7)  | 38(2)           | 36(2)           | 41(2)           | -1(2)           | 10(2)           | -7(2)           |
| C(8)  | 35(2)           | 51(3)           | 58(3)           | -3(2)           | 10(2)           | -11(2)          |
| C(9)  | 43(3)           | 58(3)           | 69(3)           | 3(2)            | 27(2)           | -9(2)           |
| C(10) | 50(3)           | 50(3)           | 53(3)           | -2(2)           | 29(2)           | -7(2)           |
| C(11) | 44(2)           | 29(2)           | 39(2)           | 3(2)            | 18(2)           | -1(2)           |
| C(12) | 49(3)           | 48(3)           | 42(2)           | -5(2)           | 9(2)            | -10(2)          |
| C(13) | 52(3)           | 45(2)           | 35(2)           | 0(2)            | 11(2)           | -3(2)           |
| C(14) | 31(2)           | 28(2)           | 31(2)           | -1(2)           | 8(2)            | -3(2)           |
| C(15) | 31(2)           | 32(2)           | 34(2)           | 3(2)            | 9(2)            | -4(2)           |
| C(16) | 33(2)           | 42(2)           | 37(2)           | 3(2)            | 5(2)            | -8(2)           |
| C(17) | 48(3)           | 47(2)           | 30(2)           | -4(2)           | 7(2)            | -11(2)          |
| C(18) | 40(2)           | 42(2)           | 36(2)           | -2(2)           | 15(2)           | -4(2)           |
| C(19) | 37(2)           | 33(2)           | 32(2)           | -2(2)           | 12(2)           | -2(2)           |
| C(20) | 33(2)           | 51(3)           | 42(2)           | -2(2)           | 11(2)           | 0(2)            |
| C(21) | 34(2)           | 63(3)           | 58(3)           | 1(2)            | 17(2)           | -2(2)           |
| C(22) | 51(3)           | 53(3)           | 104(4)          | -9(3)           | 33(3)           | -2(2)           |
| C(23) | 32(2)           | 46(2)           | 35(2)           | -3(2)           | 13(2)           | -2(2)           |
| C(24) | 43(2)           | 50(3)           | 42(2)           | -4(2)           | 16(2)           | -13(2)          |
| C(25) | 44(3)           | 53(3)           | 64(3)           | -4(2)           | 28(2)           | 0(2)            |
| C(26) | 39(2)           | 31(2)           | 27(2)           | -5(2)           | 14(2)           | -5(2)           |
| C(27) | 40(2)           | 35(2)           | 36(2)           | -7(2)           | 15(2)           | -6(2)           |

|        |        |       |        |        |        |        |
|--------|--------|-------|--------|--------|--------|--------|
| C(28)  | 51(3)  | 48(3) | 44(2)  | -8(2)  | 26(2)  | -10(2) |
| C(29)  | 61(3)  | 47(3) | 30(2)  | -1(2)  | 16(2)  | -10(2) |
| C(30)  | 48(3)  | 45(2) | 32(2)  | 1(2)   | 5(2)   | 1(2)   |
| C(31)  | 37(2)  | 34(2) | 34(2)  | -4(2)  | 10(2)  | -2(2)  |
| C(32)  | 38(2)  | 56(3) | 44(2)  | -2(2)  | 14(2)  | 5(2)   |
| C(33)  | 65(7)  | 73(5) | 82(6)  | 4(4)   | 22(5)  | 22(4)  |
| C(34)  | 61(5)  | 86(7) | 115(8) | -25(7) | 49(5)  | -23(4) |
| C(32A) | 38(2)  | 56(3) | 44(2)  | -2(2)  | 14(2)  | 5(2)   |
| C(35)  | 41(2)  | 44(2) | 47(2)  | -8(2)  | 17(2)  | 0(2)   |
| C(36)  | 81(4)  | 57(3) | 83(4)  | -2(3)  | 8(3)   | 17(3)  |
| C(37)  | 31(3)  | 82(4) | 139(6) | 36(4)  | 9(3)   | -1(3)  |
| Cl(1)  | 52(1)  | 32(1) | 46(1)  | -2(1)  | 24(1)  | 0(1)   |
| Cl(2)  | 62(1)  | 80(2) | 62(1)  | -17(1) | 16(1)  | -10(1) |
| Cl(3)  | 94(2)  | 74(2) | 57(1)  | -12(1) | -16(1) | 11(1)  |
| C(38)  | 32(3)  | 70(5) | 55(4)  | 6(3)   | 9(3)   | 11(3)  |
| Cl(4)  | 118(1) | 66(1) | 81(1)  | -8(1)  | 42(1)  | 8(1)   |
| Cl(5)  | 88(2)  | 86(1) | 83(2)  | -9(1)  | 52(2)  | -7(1)  |
| C(39)  | 57(3)  | 60(3) | 96(4)  | -3(3)  | 32(3)  | 0(3)   |
| Cl(4A) | 118(1) | 66(1) | 81(1)  | -8(1)  | 42(1)  | 8(1)   |
| C(39A) | 57(3)  | 60(3) | 96(4)  | -3(3)  | 32(3)  | 0(3)   |

---

**Table 5. Hydrogen coordinates ( $\times 10^4$ ) and isotropic displacement parameters ( $\text{\AA}^2 \times 10^{-3}$ ) for k09161.**

|        | x        | y        | z        | U(eq)  |
|--------|----------|----------|----------|--------|
| H(4N)  | 4060(40) | 4596(19) | 2420(30) | 37(11) |
| H(2A)  | 5163     | 7433     | 1491     | 40     |
| H(3A)  | 5791     | 7599     | 3021     | 42     |
| H(5A)  | 6334     | 5566     | 2452     | 65     |
| H(5B)  | 5493     | 5245     | 1620     | 65     |
| H(5C)  | 6078     | 4898     | 2475     | 65     |
| H(8A)  | -468     | 4821     | 1577     | 59     |
| H(9A)  | -693     | 5012     | 2881     | 65     |
| H(10A) | 1094     | 5181     | 4025     | 58     |
| H(12A) | 797      | 4697     | 669      | 72     |
| H(12B) | 2089     | 4354     | 1125     | 72     |
| H(12C) | 2156     | 5018     | 940      | 72     |
| H(13A) | 4265     | 4872     | 4173     | 67     |
| H(13B) | 3372     | 5123     | 4687     | 67     |
| H(13C) | 3965     | 5537     | 4145     | 67     |
| H(16A) | 1224     | 6008     | -332     | 46     |
| H(17A) | 2488     | 5735     | -1155    | 52     |
| H(18A) | 4687     | 5888     | -703     | 46     |
| H(20A) | 2306     | 6473     | 1767     | 51     |
| H(21A) | 623      | 5859     | 996      | 76     |
| H(21B) | 1        | 6380     | 393      | 76     |
| H(21C) | 103      | 6402     | 1366     | 76     |
| H(22A) | 1236     | 7338     | 1426     | 101    |
| H(22B) | 1196     | 7276     | 467      | 101    |
| H(22C) | 2543     | 7365     | 1186     | 101    |
| H(23A) | 6542     | 6417     | 1317     | 45     |
| H(24A) | 6088     | 7164     | 317      | 67     |
| H(24B) | 6282     | 6740     | -380     | 67     |
| H(24C) | 7480     | 6902     | 418      | 67     |
| H(25A) | 6743     | 5471     | 848      | 77     |

|        |      |      |      |     |
|--------|------|------|------|-----|
| H(25B) | 7913 | 5867 | 811  | 77  |
| H(25C) | 6777 | 5723 | -31  | 77  |
| H(28A) | 3679 | 6742 | 5290 | 54  |
| H(29A) | 5599 | 6382 | 6190 | 55  |
| H(30A) | 7360 | 6240 | 5716 | 52  |
| H(32)  | 7378 | 6442 | 3588 | 55  |
| H(33A) | 8741 | 5810 | 5034 | 111 |
| H(33B) | 8947 | 5783 | 4130 | 111 |
| H(33C) | 7656 | 5535 | 4257 | 111 |
| H(34A) | 8832 | 6898 | 5170 | 123 |
| H(34B) | 8264 | 7241 | 4311 | 123 |
| H(34C) | 9426 | 6805 | 4418 | 123 |
| H(32A) | 7524 | 6576 | 3644 | 55  |
| H(33D) | 8132 | 5624 | 4775 | 52  |
| H(33E) | 8625 | 5703 | 3976 | 52  |
| H(33F) | 7133 | 5586 | 3848 | 52  |
| H(34D) | 8540 | 7032 | 5060 | 82  |
| H(34E) | 9478 | 6771 | 4586 | 82  |
| H(34F) | 9175 | 6420 | 5321 | 82  |
| H(35A) | 3026 | 6975 | 3073 | 52  |
| H(36A) | 3676 | 7831 | 3828 | 116 |
| H(36B) | 2748 | 7688 | 4376 | 116 |
| H(36C) | 2151 | 7801 | 3389 | 116 |
| H(37A) | 1868 | 6296 | 3522 | 132 |
| H(37B) | 1038 | 6868 | 3343 | 132 |
| H(37C) | 1799 | 6687 | 4287 | 132 |
| H(38A) | 8588 | 8573 | 2257 | 64  |
| H(38B) | 7469 | 8298 | 2561 | 64  |
| H(38C) | 7532 | 8192 | 2452 | 100 |
| H(38D) | 8994 | 8320 | 2493 | 100 |
| H(39A) | 7941 | 3368 | 3930 | 83  |
| H(39B) | 6866 | 3647 | 3153 | 83  |
| H(39C) | 7487 | 3382 | 3840 | 83  |
| H(39D) | 7094 | 3728 | 2975 | 83  |

---



**Table 6. Hydrogen bonds for k09161 [Å and °].**

| D-H...A            | d(D-H)  | d(H...A) | d(D...A) | <(DHA) |
|--------------------|---------|----------|----------|--------|
| N(4)-H(4N)...Cl(1) | 0.86(4) | 2.24(5)  | 3.098(4) | 175(4) |

Symmetry transformations used to generate equivalent atoms:

## Single Crystal X-ray Diffraction Report for **Ti(IMesN<sup>^</sup>Imine)Cl<sub>4</sub> (4a)**

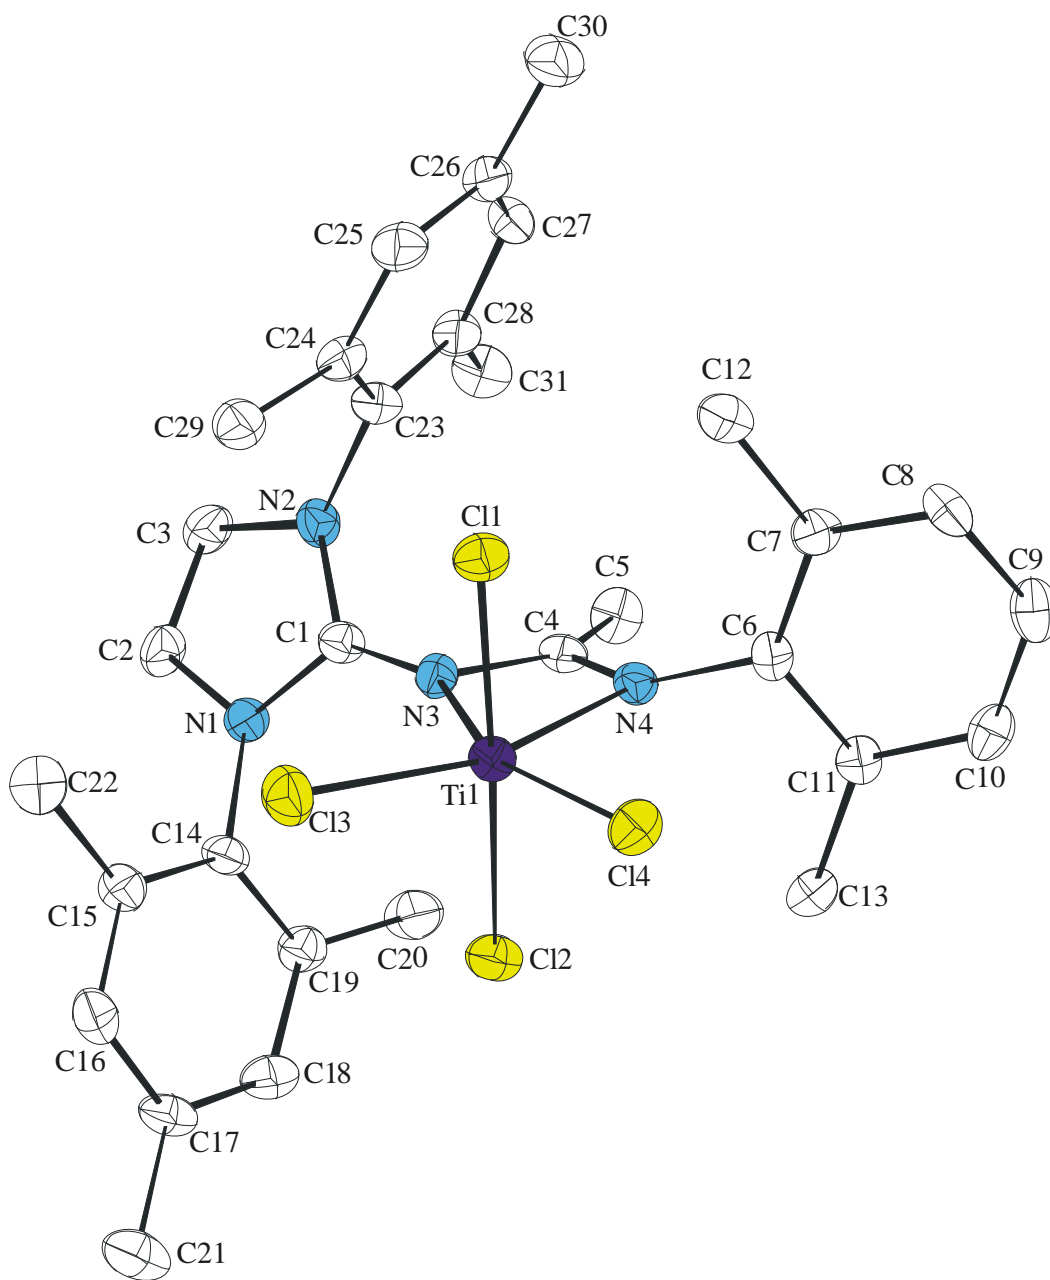

**Table 1. Crystal data and structure refinement for Ti(IMesN<sup>^</sup>Imine)Cl<sub>4</sub> (4a)**

|                                   |                                                                   |                    |
|-----------------------------------|-------------------------------------------------------------------|--------------------|
| Identification code               | k09228                                                            |                    |
| Empirical formula                 | C <sub>32</sub> H <sub>37</sub> Cl <sub>7</sub> N <sub>4</sub> Ti |                    |
| Formula weight                    | 773.71                                                            |                    |
| Temperature                       | 150(1) K                                                          |                    |
| Wavelength                        | 0.71073 Å                                                         |                    |
| Crystal system                    | Monoclinic                                                        |                    |
| Space group                       | C 2/c                                                             |                    |
| Unit cell dimensions              | a = 31.2113(7) Å                                                  | α = 90°.           |
|                                   | b = 9.2685(4) Å                                                   | β = 105.3630(18)°. |
|                                   | c = 25.6275(8) Å                                                  | γ = 90°.           |
| Volume                            | 7148.7(4) Å <sup>3</sup>                                          |                    |
| Z                                 | 8                                                                 |                    |
| Density (calculated)              | 1.438 Mg/m <sup>3</sup>                                           |                    |
| Absorption coefficient            | 0.792 mm <sup>-1</sup>                                            |                    |
| F(000)                            | 3184                                                              |                    |
| Crystal size                      | 0.30 x 0.30 x 0.15 mm <sup>3</sup>                                |                    |
| Theta range for data collection   | 2.72 to 27.48°.                                                   |                    |
| Index ranges                      | -40 ≤ h ≤ 38, -12 ≤ k ≤ 12, -23 ≤ l ≤ 33                          |                    |
| Reflections collected             | 22260                                                             |                    |
| Independent reflections           | 8106 [R(int) = 0.0735]                                            |                    |
| Completeness to theta = 27.48°    | 99.0 %                                                            |                    |
| Absorption correction             | Semi-empirical from equivalents                                   |                    |
| Max. and min. transmission        | 0.886 and 0.751                                                   |                    |
| Refinement method                 | Full-matrix least-squares on F <sup>2</sup>                       |                    |
| Data / restraints / parameters    | 8106 / 0 / 406                                                    |                    |
| Goodness-of-fit on F <sup>2</sup> | 1.019                                                             |                    |
| Final R indices [I > 2σ(I)]       | R1 = 0.0631, wR2 = 0.1441                                         |                    |
| R indices (all data)              | R1 = 0.1526, wR2 = 0.1909                                         |                    |
| Largest diff. peak and hole       | 0.787 and -0.660 e.Å <sup>-3</sup>                                |                    |

Table 2. Atomic coordinates ( $\times 10^4$ ) and equivalent isotropic displacement parameters ( $\text{\AA}^2 \times 10^3$ ) for k09228.  $U(\text{eq})$  is defined as one third of the trace of the orthogonalized  $U^{ij}$  tensor.

|       | x       | y       | z       | $U(\text{eq})$ |
|-------|---------|---------|---------|----------------|
| Ti(1) | 6255(1) | 2029(1) | 6538(1) | 24(1)          |
| Cl(1) | 6845(1) | 1482(1) | 6180(1) | 32(1)          |
| Cl(2) | 5691(1) | 2603(1) | 6922(1) | 32(1)          |
| Cl(3) | 6747(1) | 1927(1) | 7378(1) | 38(1)          |
| Cl(4) | 5958(1) | -167(1) | 6313(1) | 32(1)          |
| N(1)  | 6763(1) | 6549(4) | 6354(1) | 25(1)          |
| N(2)  | 6512(1) | 6298(4) | 7064(1) | 24(1)          |
| N(3)  | 6321(1) | 4409(4) | 6396(1) | 23(1)          |
| N(4)  | 5926(1) | 2930(4) | 5784(1) | 22(1)          |
| C(1)  | 6514(1) | 5678(5) | 6588(2) | 24(1)          |
| C(2)  | 6912(1) | 7718(5) | 6691(2) | 29(1)          |
| C(3)  | 6758(1) | 7579(5) | 7130(2) | 28(1)          |
| C(4)  | 6944(1) | 6144(5) | 5906(2) | 25(1)          |
| C(5)  | 6802(1) | 6869(5) | 5411(2) | 28(1)          |
| C(6)  | 6985(1) | 6394(5) | 4998(2) | 31(1)          |
| C(7)  | 7286(1) | 5290(5) | 5069(2) | 30(1)          |
| C(8)  | 7440(1) | 4669(5) | 5582(2) | 32(1)          |
| C(9)  | 7277(1) | 5101(5) | 6011(2) | 28(1)          |
| C(10) | 6486(1) | 8145(5) | 5312(2) | 33(1)          |
| C(11) | 7455(2) | 4752(6) | 4605(2) | 41(1)          |
| C(12) | 7472(1) | 4516(5) | 6569(2) | 32(1)          |
| C(13) | 6301(1) | 5790(5) | 7469(2) | 25(1)          |
| C(14) | 6574(1) | 5265(5) | 7953(2) | 29(1)          |
| C(15) | 6380(2) | 4883(5) | 8357(2) | 32(1)          |
| C(16) | 5926(1) | 4998(5) | 8297(2) | 30(1)          |
| C(17) | 5668(1) | 5515(5) | 7807(2) | 30(1)          |
| C(18) | 5843(1) | 5924(5) | 7382(2) | 27(1)          |
| C(19) | 7077(1) | 5126(5) | 8046(2) | 40(1)          |
| C(20) | 5718(2) | 4608(6) | 8746(2) | 41(1)          |
| C(21) | 5548(1) | 6484(5) | 6858(2) | 36(1)          |
| C(22) | 6038(1) | 4282(5) | 5893(2) | 24(1)          |

|       |         |         |         |       |
|-------|---------|---------|---------|-------|
| C(23) | 5835(1) | 5492(5) | 5530(2) | 30(1) |
| C(24) | 5672(1) | 2470(4) | 5259(2) | 22(1) |
| C(25) | 5870(1) | 2318(5) | 4838(2) | 28(1) |
| C(26) | 5617(1) | 1806(5) | 4340(2) | 31(1) |
| C(27) | 5179(1) | 1439(5) | 4266(2) | 34(1) |
| C(28) | 4979(1) | 1623(5) | 4678(2) | 29(1) |
| C(29) | 5217(1) | 2139(4) | 5184(2) | 24(1) |
| C(30) | 6351(1) | 2747(6) | 4893(2) | 38(1) |
| C(31) | 4994(1) | 2375(5) | 5630(2) | 34(1) |
| Cl(5) | 5454(1) | 1083(2) | 8191(1) | 57(1) |
| Cl(6) | 6057(1) | -976(2) | 7946(1) | 65(1) |
| Cl(7) | 6376(1) | 1042(2) | 8811(1) | 64(1) |
| C(32) | 6003(2) | 783(5)  | 8167(2) | 40(1) |

---

**Table 3. Bond lengths [ $\text{\AA}$ ] and angles [ $^\circ$ ] for k09228.**

---

|             |            |
|-------------|------------|
| Ti(1)-N(4)  | 2.106(3)   |
| Ti(1)-Cl(4) | 2.2480(13) |
| Ti(1)-N(3)  | 2.253(3)   |
| Ti(1)-Cl(3) | 2.2913(13) |
| Ti(1)-Cl(2) | 2.2944(12) |
| Ti(1)-Cl(1) | 2.3182(12) |
| Ti(1)-C(22) | 2.637(4)   |
| N(1)-C(1)   | 1.365(5)   |
| N(1)-C(2)   | 1.386(5)   |
| N(1)-C(4)   | 1.455(5)   |
| N(2)-C(1)   | 1.349(5)   |
| N(2)-C(3)   | 1.400(5)   |
| N(2)-C(13)  | 1.449(5)   |
| N(3)-C(1)   | 1.354(5)   |
| N(3)-C(22)  | 1.361(5)   |
| N(4)-C(22)  | 1.312(5)   |
| N(4)-C(24)  | 1.433(5)   |
| C(2)-C(3)   | 1.341(6)   |
| C(4)-C(9)   | 1.393(6)   |
| C(4)-C(5)   | 1.400(6)   |
| C(5)-C(6)   | 1.401(6)   |
| C(5)-C(10)  | 1.517(6)   |
| C(6)-C(7)   | 1.369(6)   |
| C(7)-C(8)   | 1.398(6)   |
| C(7)-C(11)  | 1.507(6)   |
| C(8)-C(9)   | 1.388(6)   |
| C(9)-C(12)  | 1.500(6)   |
| C(13)-C(18) | 1.393(5)   |
| C(13)-C(14) | 1.394(6)   |
| C(14)-C(15) | 1.378(6)   |
| C(14)-C(19) | 1.528(6)   |
| C(15)-C(16) | 1.390(6)   |
| C(16)-C(17) | 1.385(6)   |
| C(16)-C(20) | 1.509(6)   |

|                   |            |
|-------------------|------------|
| C(17)-C(18)       | 1.394(6)   |
| C(18)-C(21)       | 1.505(6)   |
| C(22)-C(23)       | 1.487(6)   |
| C(24)-C(25)       | 1.387(6)   |
| C(24)-C(29)       | 1.415(5)   |
| C(25)-C(26)       | 1.395(6)   |
| C(25)-C(30)       | 1.522(6)   |
| C(26)-C(27)       | 1.374(6)   |
| C(27)-C(28)       | 1.373(6)   |
| C(28)-C(29)       | 1.398(6)   |
| C(29)-C(31)       | 1.504(6)   |
| Cl(5)-C(32)       | 1.754(5)   |
| Cl(6)-C(32)       | 1.749(5)   |
| Cl(7)-C(32)       | 1.765(5)   |
|                   |            |
| N(4)-Ti(1)-Cl(4)  | 93.22(10)  |
| N(4)-Ti(1)-N(3)   | 60.50(12)  |
| Cl(4)-Ti(1)-N(3)  | 153.42(9)  |
| N(4)-Ti(1)-Cl(3)  | 157.13(10) |
| Cl(4)-Ti(1)-Cl(3) | 109.33(5)  |
| N(3)-Ti(1)-Cl(3)  | 97.18(9)   |
| N(4)-Ti(1)-Cl(2)  | 93.33(9)   |
| Cl(4)-Ti(1)-Cl(2) | 90.43(5)   |
| N(3)-Ti(1)-Cl(2)  | 87.45(9)   |
| Cl(3)-Ti(1)-Cl(2) | 90.33(5)   |
| N(4)-Ti(1)-Cl(1)  | 88.31(9)   |
| Cl(4)-Ti(1)-Cl(1) | 91.05(5)   |
| N(3)-Ti(1)-Cl(1)  | 91.99(9)   |
| Cl(3)-Ti(1)-Cl(1) | 87.54(5)   |
| Cl(2)-Ti(1)-Cl(1) | 177.72(5)  |
| N(4)-Ti(1)-C(22)  | 29.49(12)  |
| Cl(4)-Ti(1)-C(22) | 122.46(10) |
| N(3)-Ti(1)-C(22)  | 31.07(12)  |
| Cl(3)-Ti(1)-C(22) | 128.21(10) |
| Cl(2)-Ti(1)-C(22) | 89.21(9)   |
| Cl(1)-Ti(1)-C(22) | 91.45(9)   |

|                   |          |
|-------------------|----------|
| C(1)-N(1)-C(2)    | 108.9(3) |
| C(1)-N(1)-C(4)    | 125.4(3) |
| C(2)-N(1)-C(4)    | 123.8(3) |
| C(1)-N(2)-C(3)    | 109.8(3) |
| C(1)-N(2)-C(13)   | 128.4(3) |
| C(3)-N(2)-C(13)   | 121.9(3) |
| C(1)-N(3)-C(22)   | 122.3(4) |
| C(1)-N(3)-Ti(1)   | 147.5(3) |
| C(22)-N(3)-Ti(1)  | 90.3(3)  |
| C(22)-N(4)-C(24)  | 122.3(3) |
| C(22)-N(4)-Ti(1)  | 98.3(2)  |
| C(24)-N(4)-Ti(1)  | 139.3(3) |
| N(2)-C(1)-N(3)    | 126.2(4) |
| N(2)-C(1)-N(1)    | 106.5(3) |
| N(3)-C(1)-N(1)    | 127.2(4) |
| C(3)-C(2)-N(1)    | 108.3(4) |
| C(2)-C(3)-N(2)    | 106.6(4) |
| C(9)-C(4)-C(5)    | 123.3(4) |
| C(9)-C(4)-N(1)    | 116.9(4) |
| C(5)-C(4)-N(1)    | 119.7(4) |
| C(4)-C(5)-C(6)    | 116.0(4) |
| C(4)-C(5)-C(10)   | 124.1(4) |
| C(6)-C(5)-C(10)   | 119.8(4) |
| C(7)-C(6)-C(5)    | 122.6(4) |
| C(6)-C(7)-C(8)    | 119.0(4) |
| C(6)-C(7)-C(11)   | 120.9(4) |
| C(8)-C(7)-C(11)   | 120.1(4) |
| C(9)-C(8)-C(7)    | 121.3(4) |
| C(8)-C(9)-C(4)    | 117.4(4) |
| C(8)-C(9)-C(12)   | 120.6(4) |
| C(4)-C(9)-C(12)   | 121.9(4) |
| C(18)-C(13)-C(14) | 122.3(4) |
| C(18)-C(13)-N(2)  | 119.9(4) |
| C(14)-C(13)-N(2)  | 117.7(3) |
| C(15)-C(14)-C(13) | 118.1(4) |
| C(15)-C(14)-C(19) | 120.0(4) |



|                   |          |
|-------------------|----------|
| C(13)-C(14)-C(19) | 121.9(4) |
| C(14)-C(15)-C(16) | 122.4(4) |
| C(17)-C(16)-C(15) | 117.2(4) |
| C(17)-C(16)-C(20) | 120.8(4) |
| C(15)-C(16)-C(20) | 122.0(4) |
| C(16)-C(17)-C(18) | 123.4(4) |
| C(13)-C(18)-C(17) | 116.5(4) |
| C(13)-C(18)-C(21) | 122.3(4) |
| C(17)-C(18)-C(21) | 121.1(4) |
| N(4)-C(22)-N(3)   | 110.7(4) |
| N(4)-C(22)-C(23)  | 122.8(4) |
| N(3)-C(22)-C(23)  | 126.1(4) |
| N(4)-C(22)-Ti(1)  | 52.2(2)  |
| N(3)-C(22)-Ti(1)  | 58.7(2)  |
| C(23)-C(22)-Ti(1) | 170.0(3) |
| C(25)-C(24)-C(29) | 120.8(4) |
| C(25)-C(24)-N(4)  | 120.7(4) |
| C(29)-C(24)-N(4)  | 118.5(3) |
| C(24)-C(25)-C(26) | 119.1(4) |
| C(24)-C(25)-C(30) | 122.3(4) |
| C(26)-C(25)-C(30) | 118.6(4) |
| C(27)-C(26)-C(25) | 120.7(4) |
| C(28)-C(27)-C(26) | 120.3(4) |
| C(27)-C(28)-C(29) | 121.2(4) |
| C(28)-C(29)-C(24) | 117.8(4) |
| C(28)-C(29)-C(31) | 121.1(4) |
| C(24)-C(29)-C(31) | 121.1(4) |
| Cl(6)-C(32)-Cl(5) | 109.7(3) |
| Cl(6)-C(32)-Cl(7) | 109.5(3) |
| Cl(5)-C(32)-Cl(7) | 110.8(3) |

---

Symmetry transformations used to generate equivalent atoms:

**Table 4. Anisotropic displacement parameters ( $\text{\AA}^2 \times 10^3$ ) for k09228. The anisotropic displacement factor exponent takes the form:  $-2\pi^2 [ h^2 a^{*2} U^{11} + \dots + 2 h k a^* b^* U^{12} ]$**

|       | U <sup>11</sup> | U <sup>22</sup> | U <sup>33</sup> | U <sup>23</sup> | U <sup>13</sup> | U <sup>12</sup> |
|-------|-----------------|-----------------|-----------------|-----------------|-----------------|-----------------|
| Ti(1) | 26(1)           | 22(1)           | 24(1)           | 1(1)            | 7(1)            | 0(1)            |
| Cl(1) | 30(1)           | 32(1)           | 36(1)           | -1(1)           | 13(1)           | 2(1)            |
| Cl(2) | 34(1)           | 34(1)           | 31(1)           | 0(1)            | 15(1)           | 0(1)            |
| Cl(3) | 38(1)           | 45(1)           | 28(1)           | 1(1)            | 2(1)            | 2(1)            |
| Cl(4) | 34(1)           | 23(1)           | 39(1)           | -2(1)           | 9(1)            | -3(1)           |
| N(1)  | 30(2)           | 23(2)           | 22(2)           | -4(2)           | 6(2)            | -3(2)           |
| N(2)  | 23(2)           | 23(2)           | 25(2)           | -2(2)           | 8(2)            | -1(2)           |
| N(3)  | 22(2)           | 23(2)           | 22(2)           | -1(2)           | 4(1)            | -3(2)           |
| N(4)  | 27(2)           | 21(2)           | 21(2)           | -1(2)           | 9(2)            | -4(2)           |
| C(1)  | 26(2)           | 23(2)           | 24(2)           | -1(2)           | 10(2)           | 0(2)            |
| C(2)  | 27(2)           | 27(3)           | 33(3)           | -2(2)           | 8(2)            | -7(2)           |
| C(3)  | 28(2)           | 24(2)           | 32(2)           | -9(2)           | 8(2)            | -7(2)           |
| C(4)  | 27(2)           | 24(2)           | 26(2)           | 1(2)            | 12(2)           | 0(2)            |
| C(5)  | 29(2)           | 29(3)           | 26(2)           | 3(2)            | 8(2)            | -4(2)           |
| C(6)  | 35(2)           | 37(3)           | 21(2)           | -2(2)           | 8(2)            | -6(2)           |
| C(7)  | 28(2)           | 34(3)           | 30(3)           | -7(2)           | 12(2)           | -7(2)           |
| C(8)  | 26(2)           | 36(3)           | 36(3)           | -3(2)           | 12(2)           | 4(2)            |
| C(9)  | 25(2)           | 29(3)           | 31(3)           | 1(2)            | 9(2)            | -6(2)           |
| C(10) | 39(3)           | 27(3)           | 35(3)           | 4(2)            | 13(2)           | 4(2)            |
| C(11) | 35(3)           | 57(4)           | 35(3)           | -5(3)           | 16(2)           | 7(2)            |
| C(12) | 26(2)           | 40(3)           | 30(2)           | 1(2)            | 8(2)            | 3(2)            |
| C(13) | 31(2)           | 26(2)           | 22(2)           | -3(2)           | 14(2)           | -5(2)           |
| C(14) | 30(2)           | 30(3)           | 27(2)           | -5(2)           | 10(2)           | -2(2)           |
| C(15) | 38(3)           | 33(3)           | 23(2)           | -3(2)           | 4(2)            | -2(2)           |
| C(16) | 39(3)           | 27(3)           | 30(3)           | -2(2)           | 21(2)           | 0(2)            |
| C(17) | 28(2)           | 29(3)           | 39(3)           | 0(2)            | 17(2)           | 1(2)            |
| C(18) | 30(2)           | 23(2)           | 29(2)           | -2(2)           | 11(2)           | -4(2)           |
| C(19) | 39(3)           | 44(3)           | 37(3)           | -2(2)           | 9(2)            | -3(2)           |
| C(20) | 56(3)           | 40(3)           | 35(3)           | -1(2)           | 25(2)           | -1(3)           |
| C(21) | 29(2)           | 42(3)           | 38(3)           | 9(2)            | 12(2)           | 2(2)            |
| C(22) | 23(2)           | 29(3)           | 24(2)           | -2(2)           | 12(2)           | 0(2)            |

|       |       |       |       |        |       |       |
|-------|-------|-------|-------|--------|-------|-------|
| C(23) | 33(2) | 20(2) | 35(3) | 1(2)   | 7(2)  | 2(2)  |
| C(24) | 27(2) | 17(2) | 20(2) | 1(2)   | 2(2)  | -1(2) |
| C(25) | 26(2) | 28(3) | 29(2) | 0(2)   | 9(2)  | -1(2) |
| C(26) | 38(3) | 35(3) | 18(2) | -1(2)  | 6(2)  | 5(2)  |
| C(27) | 39(3) | 25(3) | 32(3) | -4(2)  | 0(2)  | 2(2)  |
| C(28) | 26(2) | 21(2) | 36(3) | -3(2)  | 3(2)  | -2(2) |
| C(29) | 27(2) | 19(2) | 25(2) | 1(2)   | 5(2)  | 0(2)  |
| C(30) | 35(3) | 54(3) | 28(3) | 0(2)   | 12(2) | -2(2) |
| C(31) | 25(2) | 42(3) | 36(3) | -4(2)  | 10(2) | -8(2) |
| Cl(5) | 62(1) | 57(1) | 60(1) | 3(1)   | 30(1) | 3(1)  |
| Cl(6) | 97(1) | 41(1) | 70(1) | -19(1) | 43(1) | -4(1) |
| Cl(7) | 83(1) | 51(1) | 47(1) | 0(1)   | -2(1) | -2(1) |
| C(32) | 58(3) | 31(3) | 36(3) | -5(2)  | 20(2) | -2(2) |

---

**Table 5. Hydrogen coordinates ( x 104) and isotropic displacement parameters ( $\text{\AA}^2 \times 10^3$ ) for k09228.**

|        | x    | y    | z    | U(eq) |
|--------|------|------|------|-------|
| H(2A)  | 7091 | 8485 | 6622 | 35    |
| H(3A)  | 6807 | 8225 | 7428 | 34    |
| H(6A)  | 6897 | 6857 | 4655 | 37    |
| H(8A)  | 7661 | 3937 | 5638 | 38    |
| H(10A) | 6356 | 8251 | 5619 | 50    |
| H(10B) | 6249 | 7982 | 4980 | 50    |
| H(10C) | 6649 | 9024 | 5274 | 50    |
| H(11A) | 7713 | 4128 | 4744 | 62    |
| H(11B) | 7541 | 5575 | 4415 | 62    |
| H(11C) | 7220 | 4203 | 4354 | 62    |
| H(12A) | 7571 | 5317 | 6822 | 48    |
| H(12B) | 7726 | 3897 | 6568 | 48    |
| H(12C) | 7247 | 3951 | 6682 | 48    |
| H(15A) | 6564 | 4528 | 8689 | 39    |
| H(17A) | 5357 | 5595 | 7758 | 37    |
| H(19A) | 7142 | 4757 | 7717 | 60    |
| H(19B) | 7195 | 4458 | 8346 | 60    |
| H(19C) | 7216 | 6075 | 8135 | 60    |
| H(20A) | 5433 | 4125 | 8594 | 62    |
| H(20B) | 5669 | 5487 | 8935 | 62    |
| H(20C) | 5916 | 3959 | 9002 | 62    |
| H(21A) | 5270 | 6846 | 6919 | 54    |
| H(21B) | 5481 | 5702 | 6591 | 54    |
| H(21C) | 5699 | 7268 | 6722 | 54    |
| H(23A) | 5986 | 5596 | 5242 | 45    |
| H(23B) | 5865 | 6389 | 5739 | 45    |
| H(23C) | 5519 | 5290 | 5369 | 45    |
| H(26A) | 5750 | 1709 | 4048 | 37    |
| H(27A) | 5014 | 1057 | 3929 | 41    |
| H(28A) | 4673 | 1395 | 4618 | 35    |

|        |      |      |      |    |
|--------|------|------|------|----|
| H(30A) | 6508 | 2837 | 5277 | 57 |
| H(30B) | 6359 | 3673 | 4712 | 57 |
| H(30C) | 6496 | 2006 | 4726 | 57 |
| H(31A) | 4678 | 2127 | 5500 | 51 |
| H(31B) | 5023 | 3390 | 5742 | 51 |
| H(31C) | 5134 | 1762 | 5940 | 51 |
| H(32B) | 6078 | 1479 | 7906 | 48 |

---

## Single Crystal X-ray Diffraction Report for [Pd(IMesN<sup>^</sup>Imine)Cl<sub>2</sub>]<sub>2</sub> (5b)

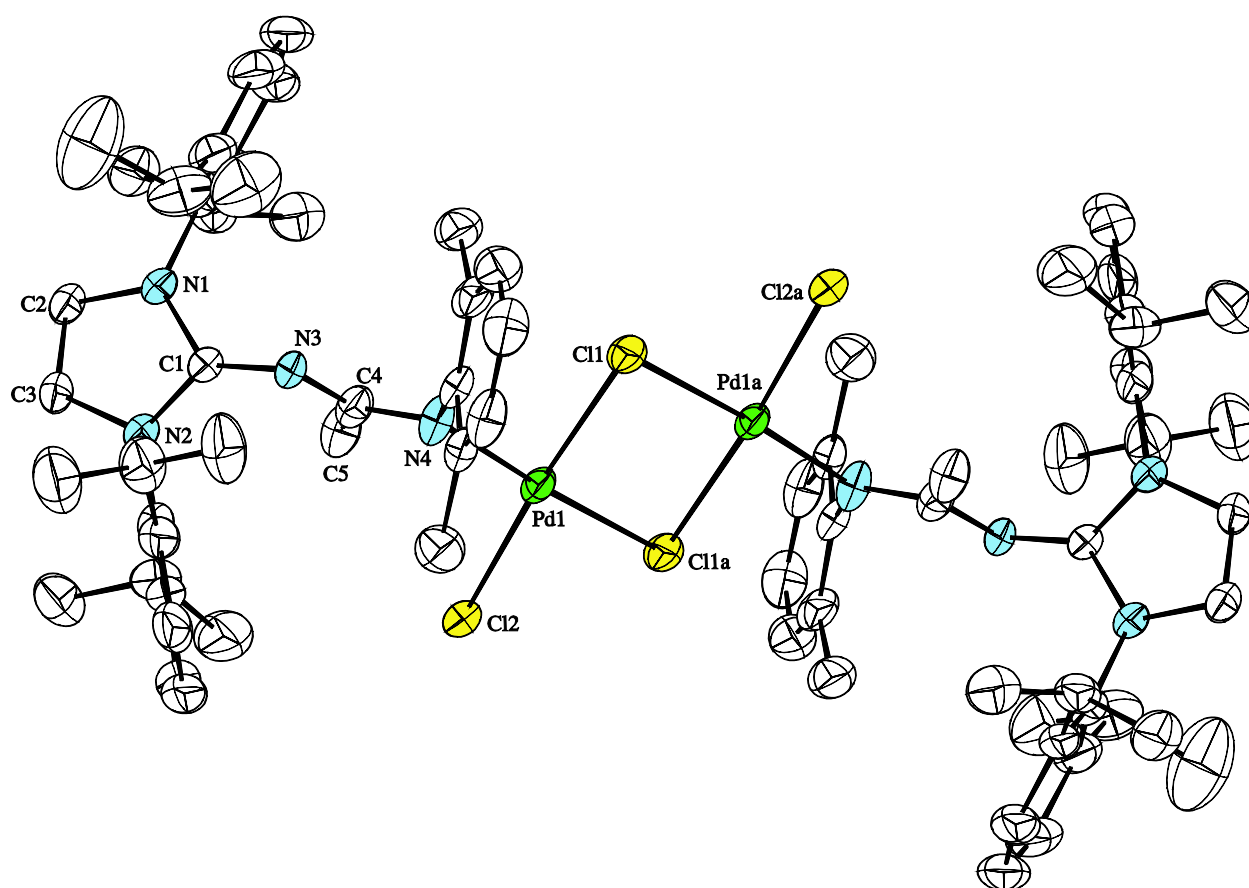

**Table 1. Crystal data and structure refinement for [Pd(IPrN<sup>^</sup>Imine)Cl<sub>2</sub>]<sub>2</sub> (5b)**

|                                   |                                                                                 |                   |
|-----------------------------------|---------------------------------------------------------------------------------|-------------------|
| Identification code               | k09220                                                                          |                   |
| Empirical formula                 | C <sub>76</sub> H <sub>100</sub> Cl <sub>8</sub> N <sub>8</sub> Pd <sub>2</sub> |                   |
| Formula weight                    | 1622.04                                                                         |                   |
| Temperature                       | 150(1) K                                                                        |                   |
| Wavelength                        | 0.71073 Å                                                                       |                   |
| Crystal system                    | Monoclinic                                                                      |                   |
| Space group                       | P 2 <sub>1</sub> /n                                                             |                   |
| Unit cell dimensions              | a = 14.0092(3) Å                                                                | α = 90°.          |
|                                   | b = 21.2077(6) Å                                                                | β = 94.8230(16)°. |
|                                   | c = 14.3841(4) Å                                                                | γ = 90°.          |
| Volume                            | 4258.43(19) Å <sup>3</sup>                                                      |                   |
| Z                                 | 2                                                                               |                   |
| Density (calculated)              | 1.265 Mg/m <sup>3</sup>                                                         |                   |
| Absorption coefficient            | 0.716 mm <sup>-1</sup>                                                          |                   |
| F(000)                            | 1680                                                                            |                   |
| Crystal size                      | 0.60 x 0.35 x 0.12 mm <sup>3</sup>                                              |                   |
| Theta range for data collection   | 2.74 to 27.49°.                                                                 |                   |
| Index ranges                      | -18 ≤ h ≤ 18, -27 ≤ k ≤ 27, -18 ≤ l ≤ 18                                        |                   |
| Reflections collected             | 28275                                                                           |                   |
| Independent reflections           | 9700 [R(int) = 0.0629]                                                          |                   |
| Completeness to theta = 27.49°    | 99.1 %                                                                          |                   |
| Absorption correction             | Semi-empirical from equivalents                                                 |                   |
| Max. and min. transmission        | 0.921 and 0.662                                                                 |                   |
| Refinement method                 | Full-matrix least-squares on F <sup>2</sup>                                     |                   |
| Data / restraints / parameters    | 9700 / 12 / 469                                                                 |                   |
| Goodness-of-fit on F <sup>2</sup> | 1.033                                                                           |                   |
| Final R indices [I > 2σ(I)]       | R1 = 0.0863, wR2 = 0.2379                                                       |                   |
| R indices (all data)              | R1 = 0.1276, wR2 = 0.2769                                                       |                   |
| Largest diff. peak and hole       | 1.514 and -1.118 e.Å <sup>-3</sup>                                              |                   |

Table 2. Atomic coordinates ( $\times 10^4$ ) and equivalent isotropic displacement parameters ( $\text{\AA}^2 \times 10^3$ ) for k09220.  $U(\text{eq})$  is defined as one third of the trace of the orthogonalized  $U^{ij}$  tensor.

|       | x        | y       | z        | $U(\text{eq})$ |
|-------|----------|---------|----------|----------------|
| Pd(1) | 5991(1)  | 185(1)  | 732(1)   | 39(1)          |
| Cl(1) | 4874(1)  | -632(1) | 568(1)   | 53(1)          |
| Cl(2) | 6708(1)  | -318(1) | 2017(1)  | 53(1)          |
| N(1)  | 8051(3)  | 2722(2) | 2175(3)  | 44(1)          |
| N(2)  | 8659(4)  | 1918(2) | 2967(4)  | 55(1)          |
| N(3)  | 7809(3)  | 1725(2) | 1452(3)  | 44(1)          |
| N(4)  | 6943(3)  | 901(2)  | 764(4)   | 51(1)          |
| C(1)  | 8107(4)  | 2082(2) | 2163(4)  | 42(1)          |
| C(2)  | 8579(4)  | 2959(3) | 2965(4)  | 51(1)          |
| C(3)  | 8948(5)  | 2470(3) | 3445(5)  | 58(2)          |
| C(4)  | 7116(4)  | 1303(3) | 1470(4)  | 48(1)          |
| C(5)  | 6461(5)  | 1270(3) | 2241(5)  | 61(2)          |
| C(6)  | 7465(4)  | 971(2)  | -49(4)   | 43(1)          |
| C(7)  | 8205(4)  | 542(3)  | -180(4)  | 49(1)          |
| C(8)  | 8669(5)  | 582(4)  | -1001(5) | 65(2)          |
| C(9)  | 8394(6)  | 1043(4) | -1658(5) | 74(2)          |
| C(10) | 7681(6)  | 1459(4) | -1479(5) | 72(2)          |
| C(11) | 7215(4)  | 1439(3) | -681(5)  | 56(2)          |
| C(12) | 8503(5)  | 41(4)   | 542(6)   | 71(2)          |
| C(13) | 6468(5)  | 1936(3) | -475(6)  | 68(2)          |
| C(14) | 7530(5)  | 3082(3) | 1453(4)  | 50(1)          |
| C(15) | 6588(5)  | 3228(3) | 1552(4)  | 57(2)          |
| C(16) | 6088(6)  | 3555(3) | 827(5)   | 69(2)          |
| C(17) | 6528(7)  | 3749(3) | 58(5)    | 79(2)          |
| C(18) | 7475(8)  | 3603(3) | -13(5)   | 85(3)          |
| C(19) | 8011(6)  | 3265(3) | 687(5)   | 65(2)          |
| C(20) | 6083(5)  | 3062(3) | 2430(4)  | 58(2)          |
| C(21) | 6038(6)  | 3629(4) | 3055(5)  | 73(2)          |
| C(22) | 5080(6)  | 2771(4) | 2203(7)  | 87(2)          |
| C(23) | 9041(7)  | 3108(4) | 603(7)   | 88(3)          |
| C(24) | 9661(10) | 3708(7) | 845(12)  | 167(6)         |



|        |          |          |          |        |
|--------|----------|----------|----------|--------|
| C(25)  | 9259(10) | 2862(6)  | -332(9)  | 125(4) |
| C(26)  | 9084(5)  | 1303(3)  | 3148(5)  | 64(2)  |
| C(27)  | 8685(7)  | 892(3)   | 3797(5)  | 76(2)  |
| C(28)  | 9136(8)  | 313(4)   | 3946(7)  | 90(3)  |
| C(29)  | 9906(9)  | 161(4)   | 3437(7)  | 94(3)  |
| C(30)  | 10304(7) | 557(4)   | 2829(6)  | 87(3)  |
| C(31)  | 9863(7)  | 1156(3)  | 2664(5)  | 74(2)  |
| C(32)  | 10326(6) | 1606(4)  | 2029(6)  | 81(2)  |
| C(33)  | 11364(8) | 1794(6)  | 2369(8)  | 114(4) |
| C(34)  | 10315(8) | 1369(5)  | 1009(6)  | 103(3) |
| C(35)  | 7876(6)  | 1075(4)  | 4366(6)  | 79(2)  |
| C(36)  | 8250(7)  | 1328(5)  | 5328(6)  | 91(3)  |
| C(37)  | 7168(8)  | 528(5)   | 4490(8)  | 111(4) |
| C(1S)  | 7264(9)  | -1682(9) | -183(12) | 110(7) |
| C(2S)  | 6250(15) | -21(7)   | -2304(8) | 100(6) |
| Pd(1A) | 4567(2)  | -742(1)  | -201(2)  | 41(1)  |
| Cl(1A) | 6053(7)  | -277(5)  | 157(7)   | 60(2)  |
| Cl(2A) | 5342(7)  | -1694(5) | -257(7)  | 63(2)  |
| Cl(3)  | 6243(8)  | -1935(6) | -759(8)  | 207(3) |
| Cl(4)  | 7955(8)  | -2307(6) | 152(8)   | 207(3) |
| Cl(5)  | 6354(4)  | -711(4)  | -1723(7) | 149(3) |
| Cl(6)  | 6796(7)  | -39(4)   | -3303(5) | 162(3) |

---

Table 3. Bond lengths [ $\text{\AA}$ ] and angles [ $^\circ$ ] for k09220.

---

|               |            |
|---------------|------------|
| Pd(1)-N(4)    | 2.019(5)   |
| Pd(1)-Cl(2)   | 2.2920(18) |
| Pd(1)-Cl(1)   | 2.3335(16) |
| Pd(1)-Cl(1)#1 | 2.3413(18) |
| Cl(1)-Pd(1)#1 | 2.3413(18) |
| N(1)-C(1)     | 1.360(7)   |
| N(1)-C(2)     | 1.395(7)   |
| N(1)-C(14)    | 1.438(7)   |
| N(2)-C(1)     | 1.381(7)   |
| N(2)-C(3)     | 1.401(7)   |
| N(2)-C(26)    | 1.447(8)   |
| N(3)-C(1)     | 1.313(7)   |
| N(3)-C(4)     | 1.321(7)   |
| N(4)-C(4)     | 1.332(7)   |
| N(4)-C(6)     | 1.439(7)   |
| N(4)-Pd(1A)#1 | 2.226(5)   |
| C(2)-C(3)     | 1.327(9)   |
| C(4)-C(5)     | 1.499(9)   |
| C(6)-C(11)    | 1.370(9)   |
| C(6)-C(7)     | 1.404(8)   |
| C(7)-C(8)     | 1.398(9)   |
| C(7)-C(12)    | 1.520(10)  |
| C(8)-C(9)     | 1.392(11)  |
| C(9)-C(10)    | 1.373(12)  |
| C(10)-C(11)   | 1.368(11)  |
| C(11)-C(13)   | 1.532(10)  |
| C(14)-C(15)   | 1.375(10)  |
| C(14)-C(19)   | 1.395(9)   |
| C(15)-C(16)   | 1.391(9)   |
| C(15)-C(20)   | 1.540(10)  |
| C(16)-C(17)   | 1.374(11)  |
| C(17)-C(18)   | 1.375(13)  |
| C(18)-C(19)   | 1.402(11)  |
| C(19)-C(23)   | 1.495(12)  |

|                     |            |
|---------------------|------------|
| C(20)-C(21)         | 1.507(9)   |
| C(20)-C(22)         | 1.544(11)  |
| C(23)-C(25)         | 1.498(14)  |
| C(23)-C(24)         | 1.564(15)  |
| C(26)-C(31)         | 1.378(12)  |
| C(26)-C(27)         | 1.425(11)  |
| C(27)-C(28)         | 1.390(11)  |
| C(27)-C(35)         | 1.502(13)  |
| C(28)-C(29)         | 1.391(15)  |
| C(29)-C(30)         | 1.365(15)  |
| C(30)-C(31)         | 1.423(11)  |
| C(31)-C(32)         | 1.506(13)  |
| C(32)-C(33)         | 1.547(13)  |
| C(32)-C(34)         | 1.550(11)  |
| C(35)-C(36)         | 1.536(11)  |
| C(35)-C(37)         | 1.546(12)  |
| C(1S)-Cl(3)         | 1.681(10)  |
| C(1S)-Cl(4)         | 1.687(10)  |
| C(2S)-Cl(6)         | 1.684(10)  |
| C(2S)-Cl(5)         | 1.686(10)  |
| Pd(1A)-N(4)#1       | 2.226(5)   |
| Pd(1A)-Cl(2A)       | 2.296(11)  |
| Pd(1A)-Cl(1A)       | 2.322(10)  |
| Pd(1A)-Cl(1A)#1     | 2.332(10)  |
| Cl(1A)-Pd(1A)#1     | 2.332(10)  |
| Cl(2A)-Cl(3)        | 1.590(15)  |
|                     |            |
| N(4)-Pd(1)-Cl(2)    | 95.07(16)  |
| N(4)-Pd(1)-Cl(1)    | 175.48(16) |
| Cl(2)-Pd(1)-Cl(1)   | 88.89(6)   |
| N(4)-Pd(1)-Cl(1)#1  | 90.60(16)  |
| Cl(2)-Pd(1)-Cl(1)#1 | 174.20(6)  |
| Cl(1)-Pd(1)-Cl(1)#1 | 85.50(6)   |
| Pd(1)-Cl(1)-Pd(1)#1 | 94.50(6)   |
| C(1)-N(1)-C(2)      | 110.0(5)   |
| C(1)-N(1)-C(14)     | 123.2(5)   |

|                     |           |
|---------------------|-----------|
| C(2)-N(1)-C(14)     | 126.8(5)  |
| C(1)-N(2)-C(3)      | 108.5(5)  |
| C(1)-N(2)-C(26)     | 124.8(5)  |
| C(3)-N(2)-C(26)     | 124.6(5)  |
| C(1)-N(3)-C(4)      | 124.2(5)  |
| C(4)-N(4)-C(6)      | 118.8(5)  |
| C(4)-N(4)-Pd(1)     | 125.2(4)  |
| C(6)-N(4)-Pd(1)     | 116.0(3)  |
| C(4)-N(4)-Pd(1A)#1  | 118.7(4)  |
| C(6)-N(4)-Pd(1A)#1  | 104.6(3)  |
| Pd(1)-N(4)-Pd(1A)#1 | 43.31(11) |
| N(3)-C(1)-N(1)      | 124.8(5)  |
| N(3)-C(1)-N(2)      | 128.7(5)  |
| N(1)-C(1)-N(2)      | 105.7(4)  |
| C(3)-C(2)-N(1)      | 107.4(5)  |
| C(2)-C(3)-N(2)      | 108.4(5)  |
| N(3)-C(4)-N(4)      | 120.3(5)  |
| N(3)-C(4)-C(5)      | 122.9(5)  |
| N(4)-C(4)-C(5)      | 116.7(5)  |
| C(11)-C(6)-C(7)     | 122.1(6)  |
| C(11)-C(6)-N(4)     | 119.7(5)  |
| C(7)-C(6)-N(4)      | 118.2(5)  |
| C(8)-C(7)-C(6)      | 118.3(6)  |
| C(8)-C(7)-C(12)     | 120.0(6)  |
| C(6)-C(7)-C(12)     | 121.7(6)  |
| C(9)-C(8)-C(7)      | 119.6(7)  |
| C(10)-C(9)-C(8)     | 119.2(7)  |
| C(11)-C(10)-C(9)    | 122.9(7)  |
| C(10)-C(11)-C(6)    | 117.8(6)  |
| C(10)-C(11)-C(13)   | 121.4(6)  |
| C(6)-C(11)-C(13)    | 120.7(6)  |
| C(15)-C(14)-C(19)   | 123.4(6)  |
| C(15)-C(14)-N(1)    | 118.6(6)  |
| C(19)-C(14)-N(1)    | 118.0(6)  |
| C(14)-C(15)-C(16)   | 117.5(7)  |
| C(14)-C(15)-C(20)   | 122.9(5)  |

|                      |           |
|----------------------|-----------|
| C(16)-C(15)-C(20)    | 119.5(6)  |
| C(17)-C(16)-C(15)    | 121.4(8)  |
| C(16)-C(17)-C(18)    | 119.6(7)  |
| C(17)-C(18)-C(19)    | 121.6(8)  |
| C(14)-C(19)-C(18)    | 116.4(8)  |
| C(14)-C(19)-C(23)    | 122.4(7)  |
| C(18)-C(19)-C(23)    | 121.2(7)  |
| C(21)-C(20)-C(15)    | 110.5(6)  |
| C(21)-C(20)-C(22)    | 111.2(6)  |
| C(15)-C(20)-C(22)    | 112.9(6)  |
| C(19)-C(23)-C(25)    | 114.9(9)  |
| C(19)-C(23)-C(24)    | 108.8(8)  |
| C(25)-C(23)-C(24)    | 109.4(9)  |
| C(31)-C(26)-C(27)    | 124.3(7)  |
| C(31)-C(26)-N(2)     | 116.4(7)  |
| C(27)-C(26)-N(2)     | 119.3(7)  |
| C(28)-C(27)-C(26)    | 116.2(10) |
| C(28)-C(27)-C(35)    | 119.9(8)  |
| C(26)-C(27)-C(35)    | 123.7(7)  |
| C(27)-C(28)-C(29)    | 119.1(10) |
| C(30)-C(29)-C(28)    | 124.8(8)  |
| C(29)-C(30)-C(31)    | 117.4(10) |
| C(26)-C(31)-C(30)    | 118.0(8)  |
| C(26)-C(31)-C(32)    | 124.2(7)  |
| C(30)-C(31)-C(32)    | 117.6(9)  |
| C(31)-C(32)-C(33)    | 114.4(8)  |
| C(31)-C(32)-C(34)    | 113.5(8)  |
| C(33)-C(32)-C(34)    | 108.5(8)  |
| C(27)-C(35)-C(36)    | 111.4(7)  |
| C(27)-C(35)-C(37)    | 113.0(8)  |
| C(36)-C(35)-C(37)    | 109.3(8)  |
| Cl(3)-C(1S)-Cl(4)    | 109.5(12) |
| Cl(6)-C(2S)-Cl(5)    | 112.1(10) |
| N(4)#1-Pd(1A)-Cl(2A) | 107.0(3)  |
| N(4)#1-Pd(1A)-Cl(1A) | 162.1(3)  |
| Cl(2A)-Pd(1A)-Cl(1A) | 87.9(4)   |

|                        |           |
|------------------------|-----------|
| N(4)#1-Pd(1A)-Cl(1A)#1 | 78.8(3)   |
| Cl(2A)-Pd(1A)-Cl(1A)#1 | 173.6(4)  |
| Cl(1A)-Pd(1A)-Cl(1A)#1 | 85.9(4)   |
| Pd(1A)-Cl(1A)-Pd(1A)#1 | 94.1(4)   |
| Cl(3)-Cl(2A)-Pd(1A)    | 134.0(8)  |
| Cl(2A)-Cl(3)-C(1S)     | 110.4(10) |

---

Symmetry transformations used to generate equivalent atoms:

#1 -x+1,-y,-z

Table 4. Anisotropic displacement parameters ( $\text{\AA}^2 \times 10^3$ ) for k09220. The anisotropic displacement factor exponent takes the form:  $-2\pi^2 [ h^2 a^{*2} U^{11} + \dots + 2 h k a^* b^* U^{12} ]$

|       | U <sup>11</sup> | U <sup>22</sup> | U <sup>33</sup> | U <sup>23</sup> | U <sup>13</sup> | U <sup>12</sup> |
|-------|-----------------|-----------------|-----------------|-----------------|-----------------|-----------------|
| Pd(1) | 39(1)           | 28(1)           | 50(1)           | -3(1)           | 2(1)            | -6(1)           |
| Cl(1) | 48(1)           | 41(1)           | 67(1)           | 11(1)           | -6(1)           | -15(1)          |
| Cl(2) | 65(1)           | 33(1)           | 60(1)           | 2(1)            | -7(1)           | -6(1)           |
| N(1)  | 56(3)           | 29(2)           | 47(2)           | -5(2)           | -1(2)           | 0(2)            |
| N(2)  | 68(3)           | 31(2)           | 64(3)           | -5(2)           | -20(3)          | 2(2)            |
| N(3)  | 51(3)           | 32(2)           | 48(2)           | -2(2)           | -8(2)           | -12(2)          |
| N(4)  | 46(3)           | 48(3)           | 61(3)           | -21(2)          | 12(2)           | -14(2)          |
| C(1)  | 47(3)           | 31(3)           | 47(3)           | 1(2)            | -3(2)           | -5(2)           |
| C(2)  | 55(3)           | 35(3)           | 60(3)           | -9(3)           | -5(3)           | -3(3)           |
| C(3)  | 67(4)           | 40(3)           | 62(4)           | -13(3)          | -22(3)          | 2(3)            |
| C(4)  | 42(3)           | 37(3)           | 64(3)           | -12(3)          | 3(3)            | 0(2)            |
| C(5)  | 56(4)           | 59(4)           | 68(4)           | -22(3)          | 14(3)           | -10(3)          |
| C(6)  | 46(3)           | 31(3)           | 54(3)           | -12(2)          | 7(2)            | -11(2)          |
| C(7)  | 48(3)           | 42(3)           | 56(3)           | -14(3)          | 0(3)            | -9(3)           |
| C(8)  | 54(3)           | 68(4)           | 77(4)           | -32(4)          | 17(3)           | -13(3)          |
| C(9)  | 84(5)           | 84(5)           | 56(4)           | -8(4)           | 21(4)           | -29(4)          |
| C(10) | 76(5)           | 67(5)           | 72(5)           | 14(4)           | -4(4)           | -15(4)          |
| C(11) | 52(3)           | 40(3)           | 77(4)           | 3(3)            | 3(3)            | -17(3)          |
| C(12) | 57(4)           | 69(5)           | 86(5)           | 2(4)            | -1(4)           | 5(4)            |
| C(13) | 62(4)           | 51(4)           | 89(5)           | 9(4)            | -4(4)           | -5(3)           |
| C(14) | 73(4)           | 30(3)           | 47(3)           | -5(2)           | -1(3)           | 3(3)            |
| C(15) | 81(4)           | 36(3)           | 52(3)           | -2(3)           | -10(3)          | 12(3)           |
| C(16) | 89(5)           | 51(4)           | 65(4)           | -2(3)           | -8(4)           | 25(4)           |
| C(17) | 129(7)          | 49(4)           | 55(4)           | 4(3)            | -8(4)           | 28(4)           |
| C(18) | 160(9)          | 45(4)           | 51(4)           | 7(3)            | 16(5)           | 10(5)           |
| C(19) | 95(5)           | 41(3)           | 59(4)           | 4(3)            | 8(4)            | -2(3)           |
| C(20) | 65(4)           | 52(4)           | 55(3)           | 1(3)            | 1(3)            | 15(3)           |
| C(21) | 86(5)           | 64(4)           | 71(4)           | -14(4)          | 15(4)           | 16(4)           |
| C(22) | 90(6)           | 71(5)           | 98(6)           | 7(5)            | -2(5)           | 3(5)            |
| C(23) | 95(6)           | 77(5)           | 97(6)           | 18(5)           | 39(5)           | 0(5)            |
| C(24) | 119(10)         | 164(13)         | 225(17)         | -68(13)         | 57(10)          | -50(10)         |

|       |         |         |         |         |        |         |
|-------|---------|---------|---------|---------|--------|---------|
| C(25) | 153(10) | 105(8)  | 125(9)  | -16(7)  | 51(8)  | 11(8)   |
| C(26) | 81(5)   | 41(3)   | 64(4)   | -16(3)  | -21(4) | 8(3)    |
| C(27) | 113(6)  | 38(3)   | 69(4)   | 8(3)    | -37(4) | -8(4)   |
| C(28) | 118(7)  | 50(4)   | 92(6)   | 2(4)    | -39(6) | 1(5)    |
| C(29) | 150(10) | 47(4)   | 77(5)   | -6(4)   | -44(6) | 21(5)   |
| C(30) | 111(7)  | 68(5)   | 74(5)   | -31(4)  | -40(5) | 28(5)   |
| C(31) | 108(6)  | 50(4)   | 58(4)   | -8(3)   | -24(4) | 10(4)   |
| C(32) | 76(5)   | 83(6)   | 81(5)   | -32(5)  | -6(4)  | 24(4)   |
| C(33) | 109(7)  | 123(9)  | 104(7)  | -39(7)  | -31(6) | 19(7)   |
| C(34) | 104(7)  | 125(8)  | 79(6)   | -40(6)  | -8(5)  | -7(6)   |
| C(35) | 88(5)   | 55(4)   | 90(5)   | 16(4)   | -12(5) | 0(4)    |
| C(36) | 99(6)   | 100(7)  | 70(5)   | 11(5)   | -17(4) | -6(5)   |
| C(37) | 113(8)  | 86(7)   | 129(8)  | 36(6)   | -18(7) | -29(6)  |
| C(1S) | 100(11) | 149(15) | 85(10)  | 3(11)   | 36(9)  | -36(11) |
| C(2S) | 98(13)  | 85(12)  | 117(16) | -49(12) | 14(12) | -7(11)  |
| Cl(3) | 187(6)  | 225(8)  | 213(7)  | -42(6)  | 40(5)  | -50(6)  |
| Cl(4) | 187(6)  | 225(8)  | 213(7)  | -42(6)  | 40(5)  | -50(6)  |
| Cl(5) | 89(4)   | 143(6)  | 225(8)  | -36(6)  | 60(4)  | -3(4)   |
| Cl(6) | 186(7)  | 202(7)  | 107(4)  | -79(5)  | 63(5)  | -15(6)  |

---



Table 5. Hydrogen coordinates ( $\times 10^4$ ) and isotropic displacement parameters ( $\text{\AA}^2 \times 10^{-3}$ ) for k09220.

|        | x     | y    | z     | U(eq) |
|--------|-------|------|-------|-------|
| H(2A)  | 8659  | 3391 | 3128  | 61    |
| H(3A)  | 9340  | 2491 | 4016  | 69    |
| H(5A)  | 6529  | 1654 | 2619  | 91    |
| H(5B)  | 6628  | 902  | 2635  | 91    |
| H(5C)  | 5797  | 1231 | 1973  | 91    |
| H(8A)  | 9168  | 295  | -1111 | 79    |
| H(9A)  | 8696  | 1070 | -2224 | 88    |
| H(10A) | 7504  | 1775 | -1929 | 87    |
| H(12A) | 8510  | 223  | 1169  | 107   |
| H(12B) | 9145  | -113 | 440   | 107   |
| H(12C) | 8047  | -310 | 484   | 107   |
| H(13A) | 6158  | 2097 | -1064 | 102   |
| H(13B) | 6783  | 2284 | -123  | 102   |
| H(13C) | 5985  | 1745 | -108  | 102   |
| H(16A) | 5428  | 3647 | 864   | 83    |
| H(17A) | 6180  | 3983 | -422  | 94    |
| H(18A) | 7774  | 3734 | -550  | 102   |
| H(20A) | 6485  | 2737 | 2783  | 69    |
| H(21A) | 6687  | 3792 | 3211  | 110   |
| H(21B) | 5755  | 3508 | 3629  | 110   |
| H(21C) | 5644  | 3957 | 2732  | 110   |
| H(22A) | 4862  | 2577 | 2765  | 130   |
| H(22B) | 5112  | 2450 | 1716  | 130   |
| H(22C) | 4629  | 3103 | 1981  | 130   |
| H(23A) | 9233  | 2777 | 1079  | 105   |
| H(24A) | 10044 | 3644 | 1440  | 250   |
| H(24B) | 9240  | 4074 | 896   | 250   |
| H(24C) | 10089 | 3784 | 351   | 250   |
| H(25A) | 8836  | 2505 | -506  | 188   |
| H(25B) | 9928  | 2722 | -303  | 188   |

|        |       |       |       |     |
|--------|-------|-------|-------|-----|
| H(25C) | 9156  | 3197  | -799  | 188 |
| H(28A) | 8923  | 25    | 4389  | 107 |
| H(29A) | 10174 | -249  | 3518  | 113 |
| H(30A) | 10853 | 437   | 2526  | 105 |
| H(32A) | 9937  | 2002  | 2012  | 97  |
| H(33A) | 11370 | 1993  | 2985  | 171 |
| H(33B) | 11611 | 2092  | 1927  | 171 |
| H(33C) | 11769 | 1417  | 2412  | 171 |
| H(34A) | 9655  | 1275  | 769   | 155 |
| H(34B) | 10705 | 986   | 990   | 155 |
| H(34C) | 10578 | 1696  | 622   | 155 |
| H(35A) | 7511  | 1422  | 4027  | 95  |
| H(36A) | 8657  | 1697  | 5250  | 136 |
| H(36B) | 8624  | 1000  | 5672  | 136 |
| H(36C) | 7707  | 1450  | 5677  | 136 |
| H(37A) | 7022  | 315   | 3891  | 166 |
| H(37B) | 6577  | 696   | 4712  | 166 |
| H(37C) | 7458  | 226   | 4947  | 166 |
| H(1S1) | 7116  | -1436 | 372   | 132 |
| H(1S2) | 7612  | -1404 | -592  | 132 |
| H(2S1) | 5562  | 77    | -2449 | 120 |
| H(2S2) | 6534  | 320   | -1899 | 120 |

---
